1  
2  
3  
4  
5  
6  
7  
8  
9  
10  
11  
12  
13  
14  
15  
16  
17  
18  
19  
20  
21  
22  
23  
24  
25  
26  
27  
28  
29  
30  
31  
32  
33  
34  
35  
36  
37  
38  
39  
40  
41  
42  
43  
44  
45

**Mannose receptor is a restriction factor of HIV in macrophages and is counteracted by the accessory protein Vpr**

Jay Lubow<sup>1</sup>, David R. Collins<sup>1</sup>, Mike Mashiba<sup>2</sup>, Brian Peterson<sup>3</sup>, Maria Virgilio<sup>4</sup>, Kathleen L Collins<sup>\*1,2,4,5</sup>

1. Department of Microbiology & Immunology, University of Michigan, Ann Arbor, MI, 48104, USA
2. Graduate Program in Immunology, University of Michigan, Ann Arbor, MI, 48104, USA
3. Department of Biochemistry, University of Michigan, Ann Arbor, MI, 48104, USA
4. Program in Cellular and Molecular Biology, University of Michigan, Ann Arbor, Michigan, United States of America
5. Department of Internal Medicine, University of Michigan, Ann Arbor, MI, 48104, USA

\*Correspondence: [klcollin@med.umich.edu](mailto:klcollin@med.umich.edu)

46 **Abstract**

47

48 HIV-1 Vpr is necessary to support HIV infection and spread in macrophages. Evolutionary  
49 conservation of Vpr suggests an important yet poorly understood role for macrophages in HIV  
50 pathogenesis. Vpr counteracts a previously unknown macrophage-specific restriction factor that  
51 targets and reduces the expression of HIV Env. Here, we report that the macrophage mannose  
52 receptor (MR), is the restriction factor targeting Env in primary human monocyte-derived  
53 macrophages. Vpr acts synergistically with HIV Nef to target distinct stages of the MR  
54 biosynthetic pathway and dramatically reduce MR expression. Silencing MR or deleting mannose  
55 residues on Env rescues Env expression in HIV-1-infected macrophages lacking Vpr. However, we  
56 also show that disrupting interactions between Env and MR reduces initial infection of  
57 macrophages by cell-free virus. Together these results reveal a Vpr-Nef-Env axis that hijacks a  
58 macrophage mannose-MR response system to facilitate infection while evading MR's normal  
59 role, which is to trap and destroy mannose-expressing pathogens.

60

61 **Introduction**

62  
63 Vpr is a highly conserved HIV accessory protein that is necessary for optimal replication in  
64 macrophages (Balliet, Kolson et al. 1994) but its mechanism of action is poorly understood.  
65 Studies using human lymphoid tissue (HLT), which are rich in both T cells and macrophages,  
66 have found that loss of Vpr decreases virus production (Rucker, Grivel et al. 2004) but only when  
67 the virus strain used is capable of efficiently infecting macrophages (Eckstein, Sherman et al.  
68 2001). These studies provide evidence that Vpr enhances infection of macrophages and  
69 increases viral burden in macrophage containing tissues. Because Vpr is packaged into the virion  
70 (Cohen, Dehni et al. 1990) and localizes to the nucleus (Lu, Spearman et al. 1993), it may  
71 enhance early viral replication events. However, mononuclear phagocytes infected with viral  
72 particles in which Vpr is provided by trans-complementation in the producer cells still have a *vpr*-  
73 null phenotype (Connor, Chen et al. 1995), indicating that Vpr's role in the HIV replication cycle  
74 continues into late stages.

75  
76 Previous work by our group demonstrated that Vpr counteracts an unidentified, macrophage-  
77 specific restriction factor that targets Env and Env-containing virions for lysosomal degradation  
78 (Mashiba, Collins et al. 2014, Collins, Lubow et al. 2015). This restriction could be conferred to  
79 permissive HEK293T cells by fusing them with MDM to create HEK293T-MDM heterokaryons. A  
80 follow up study demonstrated that by increasing steady state levels of Env, Vpr increases  
81 formation of virological synapses between infected MDM and autologous, uninfected T cells  
82 (Collins, Lubow et al. 2015). This enhances spread to T cells and dramatically increases levels of  
83 Gag p24 in the culture supernatant. This finding helps explain the paradoxical observations that  
84 Vpr is required for maximal infection of T cells in vivo (Hoch, Lang et al. 1995) but numerous  
85 studies have shown Vpr only marginally impacts infection of pure T cell cultures in vitro [e.g.  
86 (Mashiba, Collins et al. 2014)].

87

88 Our goal in the current study was to identify and characterize the myeloid restriction factor  
89 targeting Env that is counteracted by Vpr. We reasoned that macrophage-specific Env-binding  
90 proteins, including the carbohydrate binding protein mannose receptor (MR), were candidates.  
91 MR is expressed on several types of macrophages *in vivo* (Liang, Shi et al. 1996, Linehan,  
92 Martinez-Pomares et al. 1999) and is known to mediate innate immunity against various  
93 pathogens (Macedo-Ramos, Batista et al. 2014, Subramanian, Neill et al. 2019). MR recognizes  
94 mannose rich structures including high-mannose glycans, which are incorporated in many  
95 proteins during synthesis. In eukaryotic cells most high-mannose glycans are cleaved by  $\alpha$ -  
96 mannosidases and replaced with complex-type glycans as they transit through the secretory  
97 pathway. By contrast, in prokaryotic cells, high-mannose residues remain intact, making them a  
98 useful target of pattern recognition receptors including MR. Some viral proteins, including HIV-1  
99 Env, evade mannose trimming (Coss, Vasiljevic et al. 2016) and retain enough high-mannose to  
100 bind MR (Trujillo, Rogers et al. 2007, Lai, Bernhard et al. 2009). There is evidence that HIV-1  
101 proteins Nef and Tat decrease expression of MR based on studies performed in monocyte derived  
102 macrophages (MDM) and the U937 cell line, respectively (Caldwell, Egan et al. 2000, Vigerust,  
103 Egan et al. 2005). Nef dysregulates MR trafficking using an SDXXL $\Phi$  motif in MR's cytoplasmic  
104 tail (Vigerust, Egan et al. 2005), which is similar to the sequence in CD4's tail that Nef uses to  
105 remove it from the cell surface (Bresnahan, Yonemoto et al. 1998, Greenberg, DeTulleo et al.  
106 1998, Cluet, Bertsch et al. 2005). Whether MR or its modulation by viral proteins alters the course  
107 of viral replication has not been established.

108

109 Here, we confirm that Nef reduces MR expression in primary human MDM, although in our  
110 system, the effect of Nef alone was relatively small. In contrast, we report that co-expression of  
111 Vpr and Nef dramatically reduced MR expression. In the absence of both Vpr and Nef, MR levels  
112 normalized indicating that Tat did not play a significant, independent role in MR downmodulation.

113 Deleting mannose residues on Env or silencing MR alleviated mannose-dependent interactions  
114 between MR and Env and reduced the requirement for Vpr . Although the post-infection  
115 interactions between MR and Env reduced Env levels and inhibited viral release, we provide  
116 evidence that these same interactions were beneficial for initial infection of MDM. Together these  
117 results reveal mannose residues on Env and the accessory proteins Nef and Vpr are needed for  
118 HIV to utilize and then disable an important component of the myeloid innate response against  
119 pathogens intended to thwart infection.  
120

121 **Results**

122

123 **Identification of restriction factor counteracted by Vpr in primary human monocyte-derived**

124 **macrophages.** Because we had previously determined that Vpr functions in macrophages to  
125 counteract a macrophage selective restriction factor that targets Env, we reasoned that Env-  
126 binding proteins selectively expressed in macrophages were potential candidate restriction  
127 factors. To determine whether any factors fitting this description were targeted by Vpr, we  
128 performed western blot analysis of candidate Env binding proteins in MDM matched for wild type  
129 or Vpr null HIV infection frequency (Figures 1A and B). We found that one such protein, mannose  
130 receptor (MR), which is highly expressed on macrophages and has been previously shown to  
131 bind Env (Trujillo, Rogers et al. 2007, Fanibunda, Velhal et al. 2008, Lai, Bernhard et al. 2009),  
132 was significantly decreased by wild type HIV 89.6 but not by 89.6 *vpr*-null (Figure 1C and D,  
133  $p < 0.01$ ).

134

135 To confirm the effect of Vpr on Env during infections of primary human macrophages in which  
136 MR was downmodulated, we performed quantitative western blot analysis. As shown in Figures  
137 1E and F, we confirmed that amounts of Vpr sufficient for MR downmodulation were also sufficient  
138 for stabilizing expression of Env (gp160, gp120, gp41). Compiled data from nine donors clearly  
139 demonstrated results that were similar to our prior publication (Mashiba, Collins et al. 2014); under  
140 conditions of matched infection in which there was no significant difference in p55 levels between  
141 wild type and *vpr*-null infections, all three forms of Env were significantly more abundant in the  
142 wild type infection (gp160: 4-fold,  $p < 0.002$ ; gp120: 6-fold,  $p < 0.002$ ; gp41: 4-fold,  $p < 0.001$ ).

143

144 **Combined effects of Nef and Vpr have dramatic effects on MR levels in a subset of infected**

145 **cells.** Because an earlier report indicated that Nef decreases surface expression of MR (Vigerust,  
146 Egan et al. 2005), we asked whether Nef was playing a role in MR downmodulation in our  
147 systems. Because HIVs lacking Vpr and Nef spread too inefficiently in MDM to observe effects

148 on host proteins by western blot analysis, we utilized a replication defective HIV with a GFP  
149 marker (NL4-3  $\Delta$ GPE-GFP) to allow measurement of MR expression via flow cytometry following  
150 single-round transduction. This construct has the additional advantage that it eliminates  
151 potentially confounding effects of differences in wild type and Vpr-null viral spread. Therefore, we  
152 generated the necessary mutations in *nef* and *vpr* and confirmed that these mutations only  
153 affected expression of the altered gene product in transfected HEK293T (Figure 2B). For  
154 experiments in primary human macrophages, MDM were harvested at earlier times than the  
155 experiments described in Figure 1 (five days versus ten days) because of the non-spreading  
156 nature of the virus and the capacity to use flow cytometry to identify the subset of infected cells  
157 by GFP expression (Figure 2C). Under these conditions, we found that MR expression was  
158 dramatically reduced in a subset of GFP<sup>+</sup> cells when both Vpr and Nef were expressed (Figure  
159 2C-E). Loss of function mutations in either Vpr or Nef led to modest but statistically significant MR  
160 downmodulation in a subset of cells. Combined loss of both Nef and Vpr virtually eliminated MR  
161 downmodulation (Figure 2D and E). These differences in MR downmodulation were not due to  
162 variations in multiplicity of infection of the different viral constructs as MDM transduced with the  
163 mutant viral constructs had roughly similar or slightly higher transduction rates as the parental  
164 construct (Figure 2F) but demonstrated less MR downmodulation (Figure 2E).

165

166 To determine whether the modest effect of Nef alone was due to using HIV to deliver Nef as  
167 compared to an adenoviral vector delivery system used in a prior publication (Vigerust, Egan et  
168 al. 2005), we repeated the experiment using an adenoviral vector expressing Nef. These  
169 experiments confirmed that levels of Nef sufficient to downmodulate the HIV receptor, CD4 on  
170 nearly all MDM in the culture achieved only modest effects on MR in a subset of cells (Figure 2G)  
171 similar to what was observed using the HIV reporter construct (Figure 2E). Thus, Nef and Vpr  
172 have modest but significant effects on MR when expressed individually, however the combined

173 effects of both proteins can achieve nearly complete downmodulation at least in a subset of  
174 infected cells.

175

176 While the effect of Nef has been previously reported and found to be due to disruption of MR  
177 intracellular trafficking (Vigerust, Egan et al. 2005), the effect of Vpr on MR has not been  
178 previously reported. Vpr is known to target cellular proteins involved in DNA repair pathways for  
179 proteasomal degradation via interactions with Vpr binding protein [DCAF1, (McCall, Miliiani de  
180 Marval et al. 2008)], a component of the cellular DCAF1-DDB1-CUL4 E3 ubiquitin ligase complex  
181 (Belzile, Duisit et al. 2007, Hrecka, Gierszewska et al. 2007, Le Rouzic, Belaidouni et al. 2007,  
182 Wen, Duus et al. 2007, Lahouassa, Blondot et al. 2016, Wu, Zhou et al. 2016, Zhou, DeLucia et  
183 al. 2016). Using this mechanism, Vpr degrades the uracil deglycosylases UNG2 and SMUG1 in  
184 HEK293T cells following co-transfection (Schrofelbauer, Yu et al. 2005, Schrofelbauer, Hakata et  
185 al. 2007). To determine whether Vpr directly targets MR using a similar strategy, we co-  
186 transfected NL4-3  $\Delta$ GPE-GFP or a Vpr-null derivative and an expression vector encoding MR  
187 under the control of a cytomegalovirus (CMV) promoter [pCDNA.3.hMR (Liu, Liu et al. 2004)] in  
188 HEK293T cells and analyzed MR expression by flow cytometry as shown in Fig S1. We found  
189 that Vpr in HEK293T cells had no effect on expression of MR controlled by a heterologous CMV  
190 promoter (Figure 2G and S1). Thus, we concluded that Vpr does not degrade MR by the direct  
191 mechanism it uses to degrade UNG2 and SMUG1.

192

193 In addition to targeting proteins for degradation, Vpr also functions to inhibit transcription of genes  
194 such as *IFNA1* (Laguette, Bregnard et al. 2014, Mashiba, Collins et al. 2014). Therefore, we  
195 hypothesized that Vpr may reduce MR expression via inhibition of transcription. To examine this,  
196 we again utilized infected primary human MDM expressing MR under its native promoter that  
197 were transduced with the wild type or Vpr-null reporter virus (Figure 2A). To isolate a uniform  
198 population of infected cells necessary for such an analysis, we used fluorescence activated cell



199 sorting to purify transduced (GFP<sup>+</sup>) cells. Indeed, in this system we observed a reduction in MR  
200 gene (*MRC1*) expression in transduced (GFP<sup>+</sup>) samples in a Vpr-dependent manner ( $p=0.03$ ,  
201 Figure 2H). The magnitude of this effect is consistent with prior reports of HIV-1 inhibiting *MRC1*  
202 transcription— though this was not previously linked to Vpr (Koziel, Eichbaum et al. 1998,  
203 Sukegawa, Miyagi et al. 2018).

204

### 205 **Combined effect of Vpr and Nef dramatically enhances Env levels in primary human MDM.**

206 To determine whether the striking downmodulation of MR we observed with expression of both  
207 Nef and Vpr affected viral spread in MR<sup>+</sup> macrophages, we generated additional mutations in HIV-  
208 1 89.6 to create a *nef*-null mutant and a *vpr-nef*-null double mutant. As expected, in transfected  
209 HEK293T cells these mutations did not alter Env protein levels (Figure 3A) or release of virions  
210 as assessed by measuring Gag p24 into the supernatant by ELISAs (Figure 3B). However, in  
211 primary human MDM infected with these HIVs, the mutants demonstrated defects in viral spread,  
212 with the combination double mutant having the greatest defect (Figure 3C and 3D). The defect in  
213 spread was caused in part by diminished virion release, which we previously showed occurred in  
214 the absence of Vpr (Mashiba, Collins et al. 2014); MDM infected with the HIV mutants released  
215 less Gag p24 even after adjusting for the frequency of infected cells (Figure 3D, right panel),

216

217 To determine whether the striking downmodulation of MR we observed with expression of both  
218 Nef and Vpr affected Env restriction in MR<sup>+</sup> macrophages, we assessed Env levels in primary  
219 human MDM infected with each construct. Because the frequency of infected cells as assessed  
220 by intracellular Gag staining (Figure 3C) and Gag pr55 expression as measured by western blot  
221 was lower in the mutants than in the wild type infection (Figure 3E), lysate from the wild type  
222 sample was serially diluted to facilitate comparisons. Remarkably, we found that the *vpr-nef*-null  
223 double mutant, which retains near normal MR levels exhibited the greatest defect in Env  
224 expression (Figure 3E, compare lanes with similar Gag as indicated). Mutation of *vpr* and *nef*

225 individually, which greatly increased MR levels compared to wild type HIV infection, also led to  
226 striking defects in Env expression. In sum, the effect of Vpr and Nef we observed on MR correlated  
227 inversely with Env levels, consistent with MR being the previously reported restriction factor in  
228 primary human MDM that restricts Env expression by accelerated lysosomal degradation and  
229 which is counteracted by Vpr (Mashiba, Collins et al. 2014). In the case of Vpr, this is likely solely  
230 due to downmodulation of MR. In the case of Nef, combined effects on MR and other Env binding  
231 proteins including CD4 (Aiken, Konner et al. 1994) and chemokine receptors (Michel, Ganter et  
232 al. 2006) may play a role.

233

234 **Evidence for a role for mannose-containing glycan in restriction of Env in primary human**  
235 **MDM.** Previously reported interactions between HIV Env and MR are believed to occur via  
236 mannose-containing glycans on Env. Interestingly, the macrophage tropic strain YU-2, which was  
237 isolated from the CNS of an AIDS patient (Li, Kappes et al. 1991), lacks a glycan structure known  
238 as the mannose patch. This structure is the target of several broadly neutralizing antibodies  
239 including 2G12, to which YU-2 is highly resistant (Trkola, Purtscher et al. 1996). We hypothesized  
240 that loss of the mannose patch would decrease interactions with MR and reduce the requirement  
241 for Vpr to counteract MDM-specific restrictions to virion release and Env expression. To test this  
242 hypothesis we examined the extent to which virion release and Env expression were influenced  
243 by Vpr in primary human MDM infected with YU-2 or 89.6 HIVs. Remarkably, we observed no  
244 significant difference in Gag p24 release between wild type and *vpr*-null YU-2 infection of MDM  
245 (Figure 4A). Moreover, the *vpr*-null mutant of YU2 displayed only a minor defect in Env expression  
246 compared to Vpr null versions of 89.6 and NL4-3 (Figure 4B).

247

248 Because there are a number of other genetic differences between YU-2 and the other HIVs, we  
249 constructed a chimeric virus, which restricted the differences to the *env* open reading frame. As  
250 shown in Figure 4C, a fragment of the YU-2 genome containing most of *env* but none of *vpr*

251 (Figure 4C, shaded portion) was cloned into NL4-3 and NL4-3 *vpr*-null. As expected, these genetic  
252 alterations did not affect Env protein levels or virion release in transfected HEK293T cells (Figure  
253 4D and E). To confirm that the chimeric Env was still functional, we examined infectivity in T cells  
254 prior to performing our analyses in primary human MDM. Conveniently, sequence variation within  
255 the gp120 region allows YU-2 Env to only utilize the co-receptor CCR5 for entry, whereas NL4-3  
256 can only utilize CXCR4. Thus, we expected the NL4-3 *env*<sup>YU2</sup> chimera would switch from being  
257 CXCR4- to CCR5-tropic. To test this, we utilized a T cell line expressing both chemokine receptors  
258 (MOLT4-R5) and selectively blocked entry via CXCR4 and CCR5 entry inhibitors [AMD3100 and  
259 maraviroc, respectively (Figure 4F)]. As expected, entry of MOLT4-R5 cells by NL4-3 was blocked  
260 by AMD3100 but not maraviroc, indicating CXCR4-tropism. The chimeric NL4-3 *env*<sup>YU2</sup> and wild  
261 type YU-2 demonstrated the reverse pattern, indicating CCR5-tropism. These results  
262 demonstrated that we had made the expected changes in the chimeric Env without disrupting its  
263 capacity to infect cells.

264  
265 To determine whether swapping a limited portion of YU-2 containing Env into NL4-3 alleviated  
266 the requirement for Vpr, we examined Env expression and virion release in primary human MDM  
267 infected with these viruses. Because the parental NL4-3 virus required pseudotyping with a  
268 macrophage-tropic Env for entry and was unable to spread in MDM, all infections were treated  
269 with entry inhibitors AMD3100 and maraviroc 48 hours after inoculation to block subsequent  
270 rounds of infection. Remarkably, we observed that wild type NL4-3 Env but not chimeric NL4-3  
271 *env*<sup>YU2</sup> required Vpr for maximal expression (Figure 4G). Moreover, MDM infected with the  
272 chimeric HIV had a reduced requirement for Vpr for maximal virion release (Figure 4H). This  
273 experiment provides strong evidence that the requirement for Vpr can be alleviated by genetic  
274 changes within the *env* open reading frame. These results are consistent with a model in which  
275 YU-2 *env* confers resistance to the effects of MR due to the absence of the mannose rich structure  
276 on the YU-2 Env glycoprotein.

277

278 **Deletion of N-linked glycosylation sites in Env reduces Env restriction in HIV-1 infected**  
279 **human primary MDM and diminishes the need for Vpr and Nef.** To more directly assess the  
280 role of mannose in restricting expression of Env in HIV-1 infected primary human MDM, we  
281 engineered a version of 89.6 Env in which two N-linked glycosylation sites, N230 and N339 (HIV  
282 HxB2 numbering) were substituted for amino acids found at analogous positions in YU-2 Env  
283 (Figure 5A). The glycosylation sites N2330 and N339 were selected because they contain high-  
284 mannose glycan structures (Leonard, Spellman et al. 1990) that are absent in YU-2 Env. Loss of  
285 N230 limits neutralization by glycan specific antibodies (Huang, Kang et al. 2014). Loss of N339  
286 decreases the amount of oligomannose (Man<sub>9</sub>GlcNAc<sub>2</sub>) present on gp120 by over 25%,  
287 presumably by opening up the mannose patch to processing by  $\alpha$ -mannosidases (Pritchard,  
288 Spencer et al. 2015). These substitutions (N230D and N339E) in 89.6 did not alter virion production  
289 (Figure 5B) or Env protein expression (Figure 5C) in transfected HEK293T cells.

290

291 To confirm that mutation of N230 and N339 disrupted the mannose patch on Env, we assayed  
292 the ability of 2G12, which recognizes epitopes in the mannose patch (Sanders, Venturi et al. 2002,  
293 Scanlan, Pantophlet et al. 2002), to neutralize wild type and mutant Env. As shown in Figure 5D,  
294 wild type but not mannose deficient N230D N339E was neutralized by 2G12. In addition, we found  
295 that these substitutions did not disrupt infection of a T cell line that does not express MR (Figure  
296 5E). However, somewhat unexpectedly, we found that HIV containing the N230D N339E Env  
297 substitutions were approximately 40% less infectious to primary human macrophages expressing  
298 MR than the wild type parental virus (Figure 5E). This macrophage-specific difference in infectivity  
299 suggested that mannose on Env facilitates initial infection through interactions with MR, which is  
300 highly expressed on differentiated macrophages. To examine this possibility further, we asked  
301 whether mannan, which competitively inhibits MR interactions with mannose containing glycans  
302 (Shibata, Metzger et al. 1997), was inhibitory to HIV infection. As a negative control, we tested

303 89.6  $\Delta$ env pseudotyped with vesicular stomatitis virus G-protein Env (VSV-G) which has only two  
304 N-linked glycosylation sites, both of which contain complex-type rather than high-mannose  
305 glycans (Reading, Penhoet et al. 1978) and therefore should not bind MR or be inhibited by  
306 mannan. As expected, we found that infection of a T cell line lacking MR was not sensitive to  
307 mannan (Figure 5F, left panel). However, infection of MDM by wild type HIV-1 was inhibited up to  
308 16-fold by mannan. This was specific to HIV Env because mannan did not inhibit infection by HIV  
309 lacking *env* and pseudotyped with the heterologous VSV-G Env (Figure 5F). Interestingly,  
310 mannan also inhibited baseline macrophage infection by mannose-deficient Env (89.6 Env N230D  
311 N339E), indicating that N230D N339E substitutions did not completely abrogate glycans on Env  
312 that are beneficial to initial infection. In sum, our results demonstrate that interactions with  
313 mannose binding receptors are advantageous for initial HIV infection of macrophages and that  
314 the glycans remaining on Env N230D N339E retain some ability to bind glycan receptors on  
315 macrophages that facilitate infection.

316

317 While interactions between high-mannose residues on Env and MR are advantageous for viral  
318 entry, we hypothesized that they interfered with intracellular Env trafficking and were deleterious  
319 to egress of Env-containing virions in the absence of Vpr and/or Nef. To test this, we examined  
320 virion release and Env expression by HIVs encoding the mannose-deficient Env N230D N339E  
321 plus or minus Vpr expression. We found that mannose-deficient Env had a reduced requirement  
322 for Vpr for maximal virus release compared with the parental wild type virus in a spreading infection  
323 system (Figure 5G,  $p < 0.001$ ). In addition, the mannose-deficient Env had a reduced requirement  
324 for both Nef and Vpr in virion release assays using primary human MDM infected for a single  
325 round of infection (Figure 5H,  $p < 0.001$ ). Single round infection assays were used to assess the  
326 *vpr-nef* double mutant because depletion of mannose on Env did not rescue spread. This is likely  
327 due to pleiotropic effects of Nef that disrupt interference by the HIV receptors, CD4, CXCR4 and

328 CCR5 (Lama, Mangasarian et al. 1999, Michel, Allespach et al. 2005, Venzke, Michel et al. 2006)  
329 combined with the reduced infectivity of the mannose deficient Env.

330

331 Finally, we asked whether the mannose-deficient Env had increased stability in primary human  
332 MDM lacking Vpr and/or Nef by western blot analysis. Remarkably, we found that the mannose-  
333 deficient Env rescued Env expression in the absence of Vpr (Figure 5I, right side, black bars),  
334 and reduced the defect observed in the *vpr-nef*-null double mutant (Figure 5I, right side, gray  
335 bars) once differences in infection frequency were accounted for by matching pr55 expression in  
336 the dilution series. These data provide strong support for the model that MR restricts Env  
337 expression via direct interaction with high-mannose residues on Env and that this restriction is  
338 counteracted by Vpr and Nef.

339

340 **Silencing MR alleviates restriction of Env in primary human MDM lacking Vpr.** To directly  
341 test the hypothesis that MR is the restriction factor in MDM that is counteracted by Vpr, we  
342 examined the effect of MR silencing on Env expression in HIV-infected MDM lacking Vpr.  
343 Remarkably, we observed that silencing MR markedly reduced Env restriction - once differences  
344 in infection frequency as assessed by Gag pr55 expression were accounted for (Figure 6A).  
345 These results support the conclusion that the Env restriction observed in *vpr*-null 89.6 is  
346 dependent on expression of MR.

347

348 Previous work in our lab demonstrated that restriction of Env in primary human MDM disrupted  
349 formation of virological synapses and cell-to-cell spread of HIV from infected MDM to T cells  
350 (Collins, Lubow et al. 2015). Expression of Vpr alleviated these effects, dramatically increasing  
351 viral transmission – especially under conditions of low initial inoculum of free virus. To determine  
352 whether MR was responsible for these defects in MDM lacking Vpr, we measured Vpr-dependent  
353 HIV-1 spread from primary human MDM silenced for MR to activated primary T cells freshly

354 isolated from the same donor. In this assay system, co-cultured cells were stained for CD3 to  
355 distinguish T cells and CD14 to distinguish MDM as shown in Figure S2. Indeed, we found that  
356 silencing MR dramatically reduced the requirement for Vpr to support spread from MDM to T cells  
357 (Figure 6D). In addition, MR silencing reduced the need for Vpr in virus release assays in the co-  
358 culture system (Figure 6E). These data support the conclusion that MR is the previously identified  
359 restriction factor in macrophages that reduces spread from Vpr-null HIV-infected macrophages to  
360 T lymphocytes.

361

362 **Infection of macrophages dramatically facilitates initial infection by transmitter/founder (T/F)**

363 **HIVs involved in initial HIV transmission.** Because macrophages are present in genital mucosa,  
364 are permissive to HIV infection (Shen, Richter et al. 2009), and recruit HIV-permissive CD4<sup>+</sup> T  
365 cells as part of their immunologic function (Liao, Rabin et al. 1999) we wondered whether cell-to-  
366 cell spread from MDM to T cells may potentially facilitate transmission. To examine this possibility,  
367 we tested two transmitted/founder (T/F) HIV molecular clones (REJO and CH077), which can  
368 both cause detectable infection in T cells following spinnoculation (Figure 7A, upper panel) or long  
369 term culture (Ochsenbauer, Edmonds et al. 2012), but which differ in their capacity to infect  
370 macrophages (Ochsenbauer, Edmonds et al. 2012). We observed that when MDM were  
371 inoculated briefly (6 hours) and cultured for two days, REJO produced detectable infection but  
372 CH077 did not (Figure 7A, lower panel). Using the experimental protocol diagrammed in Figure  
373 7B, we observed that when T cells were cultured for two days with cell free virus without  
374 spinnoculation, both T/F viruses failed to infect a significant fraction of T cells (Figure 7C, upper  
375 panel). In contrast, when T cells were co-cultured for two days with MDM that had previously been  
376 infected as in Figure 6F, the T/F virus REJO was transmitted to T cells but CH077 was not (Figure  
377 7C, lower panel) Thus, under conditions of limited exposure to cell free virus, macrophage  
378 infection can dramatically enhance spread and speed infection to T cells. The role for Vpr in this

379 process likely contributes to its evolutionary conservation in nearly all simian and human lentivirus  
380 genomes (Mashiba and Collins 2013).

381



## 382 Discussion

383 Our findings demonstrate that HIV encodes two accessory proteins, Vpr and Nef, that dramatically  
384 reduce expression of MR on infected macrophages and provide an explanation for the  
385 evolutionary conservation of Vpr in HIV-1. Our results clearly define MR as a factor capable of  
386 restricting the expression of Env and interfering with virion release. While the effect of Nef on MR  
387 was previously reported, the effect of Vpr on MR was entirely unexpected. The evidence that Vpr  
388 counteracts MR to stabilize Env is strong. We demonstrate that Vpr expression correlates with  
389 reduced MR expression. In addition, we show that loss of Vpr can be rescued by changes within  
390 the Env locus that reduce detrimental interactions with MR, including point mutations that  
391 selectively delete mannose residues. Finally, silencing MR expression decreased the requirement  
392 for Vpr to stabilize Env and enhanced spread to T cells and virion release.

393

394 Other investigators have reported that MR inhibits virion egress in HEK293T cells (Sukegawa,  
395 Miyagi et al. 2018). However, this study differed from results we report here in primary human  
396 macrophages because the prior study observed effects on virions that were Env-independent. In  
397 addition, they did not examine effects of Vpr on MR in their system (Sukegawa, Miyagi et al.  
398 2018). In the primary macrophage system, Vpr-sensitive virion restriction depends entirely on an  
399 intact *env* open reading frame (Mashiba, Collins et al. 2014) and genetic changes in the *env* open  
400 reading frame – especially those that alter N-linked glycosylation sites – critically affect the  
401 requirement for Vpr. The effect of MR on Env and Env-containing virion release helps explain the  
402 significance behind prior in vivo observations demonstrating that HIV infection reduces expression  
403 and activity of MR in infected humans (Koziel, Kruskal et al. 1993, Koziel, Eichbaum et al. 1998)  
404 and that SIV does the same in monkeys (Holder, McGary et al. 2014). By demonstrating how the  
405 effect of Vpr on MR promotes macrophage to T cell spread, we also provide an explanation for  
406 how Vpr increases infection of human lymphoid tissue *ex vivo* (Eckstein, Sherman et al. 2001,

407 Rucker, Grivel et al. 2004), which contain macrophages and T cells in a highly physiological,  
408 three-dimensional environment.

409

410 As Nef had already been shown to reduce MR surface expression (Vigerust, Egan et al. 2005),  
411 the observation that HIV encodes a second protein, Vpr, to reduce MR expression was  
412 unanticipated, but not unprecedented; other host proteins are known to be affected by more than  
413 one lentiviral accessory protein. The HIV receptor, CD4, is simultaneously targeted by Vpu, Nef  
414 and Env in HIV-1 (Chen, Gandhi et al. 1996) and tetherin is alternately targeted by Vpu, Nef, or  
415 Env in different strains of primate lentiviruses (Harris, Hultquist et al. 2012). Nef has also been  
416 shown to downmodulate the viral co-receptors CXCR4 (Venzke, Michel et al. 2006) and CCR5  
417 (Michel, Allespach et al. 2005), which may also interfere with Env expression in infected cells.  
418 Nef's activity against CXCR4, CCR5, and MR presumably has the same ultimate purpose as its  
419 activity against CD4, namely to stabilize Env, enhance virion release and prevent superinfection  
420 of the producer cell (Lama, Mangasarian et al. 1999, Ross, Oran et al. 1999). The need for Vpr  
421 and Nef to simultaneously target MR may be explained by the high level of MR expression,  
422 estimated at 100,000 copies per macrophage (Stahl, Schlesinger et al. 1980). Alone, Vpr and Nef  
423 each has a modest effect on MR in primary human macrophages. The magnitude of the effect  
424 and the fraction of cells affected increased when both proteins were expressed. The potent  
425 combined effect likely derives from synergistic targeting of MR at two different stages of MR  
426 synthesis. Nef was shown to alter MR trafficking (Vigerust, Egan et al. 2005) and we show Vpr  
427 inhibits MR transcription.

428

429 In sharp contrast to the effect we observed in MDM, Vpr did not affect MR protein levels when  
430 MR was expressed via a heterologous promoter in the HEK293T cell line, which is derived from  
431 human embryonic kidney cells, which are not a natural target of HIV. The cell type selectivity in  
432 these experiments is likely due to differences in the promoters driving MR expression, however,

433 we cannot rule out the existence of other macrophage specific pathways required to recreate the  
434 effect of Vpr on MR. Further work will be needed to examine these questions and determine other  
435 mechanistic details. For example, it will be important to determine whether Vpr utilizes its cellular  
436 co-factors to affect MR levels. Vpr is perhaps best known for its interaction with Vpr binding protein  
437 [DCAF1, (McCall, Miliani de Marval et al. 2008)], a component of the cellular DCAF1-DDB1-CUL4  
438 E3 ubiquitin ligase complex that plays a role in Vpr-dependent disruption of the cell cycle and  
439 cellular DNA repair pathways in dividing cells (Belzile, Duisit et al. 2007, Hrecka, Gierszewska et  
440 al. 2007, Le Rouzic, Belaidouni et al. 2007, Wen, Duus et al. 2007, Lahouassa, Blondot et al.  
441 2016, Wu, Zhou et al. 2016, Zhou, DeLucia et al. 2016). This interaction has also been linked to  
442 transcriptional inhibition of type I interferons in response to infection in macrophage cultures  
443 (Laguette, Bregnard et al. 2014, Mashiba, Collins et al. 2014). Additional research is now needed  
444 to determine whether repression of MR and IFN transcription is mediated by the same DCAF-1  
445 dependent pathway.

446  
447 Interactions between MR and Env are likely mediated by the unusually high density of N linked  
448 glycosylation sites that retain high-mannose glycans, which is a known PAMP (Stahl and  
449 Ezekowitz 1998, McGreal, Rosas et al. 2006). Here, we show that selective deletion of mannose  
450 residues alleviated the requirement for Vpr. Deletion of individual glycosylation sites is known to  
451 lead to changes in the processing of neighboring glycans and deletions at certain sites lead to  
452 larger than expected losses of oligomannose (Balzarini 2007) presumably because their removal  
453 allows greater access and facilitates trimming of surrounding glycans. Selective pressure to  
454 maintain mannose residues on Env may be due to the enhanced attachment they mediate.  
455 Indeed, we provide strong evidence that Env's interaction with MR boosts initial infection of MDM.  
456 This finding is supported by a prior report that MR enhances HIV-1 binding to macrophages and  
457 transmission of the bound virus to co-cultured T cells (Nguyen and Hildreth 2003). Our study adds  
458 to these findings by providing evidence that interactions with mannose binding receptors also

459 enhance direct infection of macrophages. Moreover, the capacity of Vpr and Nef to mitigate the  
460 effect of detrimental intracellular interactions during viral egress limits the negative impact of  
461 retaining high-mannose on Env. In addition, the dense glycan packing, which is privileged from  
462 antibody recognition through immune tolerance, is believed to play a role in evasion of the  
463 antibody response (Stewart-Jones, Soto et al. 2016).

464

465 Here we also confirm our prior observation that Vpr enhances transmission of HIV from infected  
466 macrophages to primary T lymphocytes. Macrophages prepared according to our culture  
467 conditions are more easily infected by cell free virus in vitro than activated T cells, which require  
468 spinoculation for detectable infection following short incubations (48 hours). The observation that  
469 T/F viral strains with a greater capacity to infect macrophages have an advantage in our co-culture  
470 system suggests a role for Vpr during transmission. The accelerated spread to T cells we  
471 observed may be critical to establishing a persistent infection before innate and adaptive immune  
472 responses are activated. While in vitro assays of T/F viruses have suggested strong evolutionary  
473 selection for T cell infection with limited capacity to infect macrophages, other studies indicate  
474 that T/F viruses are generally less infectious to all cell types compared to viruses isolated at other  
475 stages (Peters, Gonzalez-Perez et al. 2015), but appear to be selected primarily by their  
476 resistance to interferon (Iyer, Bibollet-Ruche et al. 2017). The strong selective pressure to retain  
477 Vpr despite its limited effect on T cell-only cultures indicates there is more to learn about the role  
478 of Vpr, macrophages and T/F viruses in HIV transmission and pathogenesis. Collectively, these  
479 studies suggest that novel therapeutic approaches to inhibit the activity of Vpr and Nef in  
480 macrophages would potentially represent a new class of antiretroviral drug that could be an  
481 important part of a treatment or prophylactic cocktail.

482 **Materials and Methods**

483

484 **Viruses and viral vectors**

485 The following molecular clones were obtained via the AIDS Reagent Program: p89.6 (cat# 3552)  
486 from Dr. Ronald G. Collman, pNL4-3 (cat# 114) from Dr. Malcolm Martin, pREJO.c/2864 (cat#  
487 11746) and pCHO77.t/2626 (cat# 11742) from Dr. John Kappes and Dr. Christina Ochsenbauer  
488 and pYU2 (cat# 1350) from Dr. Beatrice Hahn and Dr. George Shaw. pCDNA.3.hMR was  
489 obtained from Dr. Johnny J. He (Liu, Liu et al. 2004). *Vpr*-null versions of HIV molecular clones  
490 were created by cutting the *Afl*III site within *vpr* and filling in with Klenow fragment. A *nef*-null  
491 version of 89.6 was created by deleting *nef* from its start codon to the *Xho*I site. To do this, a PCR  
492 amplicon was generated from the *Xho*I site in *env* to *env*'s stop codon. The 3' reverse primer  
493 added a *Xho*I site after the stop codon. The 89.6 genome and the amplicon were digested with  
494 *Xho*I and ligated together. (5' primer CACCATTATCGTTTCAGACCCT and 3' primer  
495 TCTCGAGTTTAAACTTATAGCAAAGCCCTTTCCA)

496

497 pSIV3+, pSPAX2, pAPPM-1221 were obtained from Dr. Jeremy Luban (Pertel, Reinhard et al.  
498 2011). pSIV3+ *vpr*-null was generated using a synthesized fragment (ThermoFisher Scientific,  
499 Waltham, Massachusetts) of the SIV genome in which the *Vpr* start codon was converted to a  
500 stop codon. pYU2 *env* was obtained from Dr. Joseph Sodroski (Sullivan, Sun et al. 1995).  
501 Creation of pNL4-3  $\Delta$ GPE-GFP was described previously (McNamara, Ganesh et al. 2012).

502

503 **Primary MDM and T cell isolation and culture**

504 Leukocytes isolated from anonymous donors by apheresis were obtained from the New York  
505 Blood Center Component Laboratory. The use of human blood from anonymous, de-identified  
506 donors was classified as non-human subject research in accordance with federal regulations and  
507 thus not subjected to formal IRB review. Peripheral blood mononuclear cells (PBMCs) were  
508 purified by Ficoll density gradient. CD14<sup>+</sup> monocytes were positively selected using a CD14

509 sorting kit (StemCell Inc., Vancouver, Canada) following the manufacturer's instructions.  
510 Monocyte-derived macrophages (MDM) were obtained by culturing monocytes in R10 [RPMI-  
511 1640 with 10% certified endotoxin-low fetal bovine serum (Invitrogen, ThermoFisher)], penicillin  
512 (10 Units/ml), streptomycin (10 µg/ml), L-glutamine (292 µg/ml), carrier-free M-CSF (50 ng/ml,  
513 R&D Systems, Minneapolis, Minnesota) and GM-CSF (50 ng/ml, R&D Systems) for seven days.  
514 Monocytes were plated at  $5 \times 10^5$  cells/well in a 24 well dish, except for those to be transduced  
515 with lentivirus and puromycin selected, which were plated at  $1 \times 10^6$  cells/well.

516

517 CD4<sup>+</sup> T lymphocytes were isolated from PBMCs by CD8 negative selection (DynaBeads,  
518 ThermoFisher), cultured in R10 for several days and activated with 5 µg/ml phytohaemagglutinin  
519 (PHA-L, Calbiochem, Millipore Sigma, Burlington, Massachusetts) overnight before addition of  
520 500 IU/ml recombinant human IL-2 (R&D Systems).

521

## 522 **Silencing by shRNA**

523 Short hairpin RNA-mediated silencing was performed as previously described (Pertel, Reinhard  
524 et al. 2011, Collins, Lubow et al. 2015). Briefly, we spinoculated freshly isolated primary  
525 monocytes with VSV-G-pseudotyped SIV3+ *vpr*-null at 2500 rpm for 2 hours with 4 µg/ml  
526 polybrene to allow Vpx-dependent degradation of SAMHD1. Cells were then incubated overnight  
527 in R10 with M-CSF (50 ng/ml) and GM-CSF (50 ng/ml) plus VSV-G-pseudotyped lentivirus  
528 containing an shRNA cassette targeting luciferase (shNC) or MR (shMR). Following an overnight  
529 incubation, the cells were cultured for 3 days in fresh medium before addition of 10 µg/ml  
530 puromycin for 3 additional days prior to HIV-1 infection. shRNA target sequences  
531 used: *Luciferase*: 5'-TACAAACGCTCTCATCGACAAG-3', *MRC1*: 5'-  
532 ATTGATTATCAGTCAAGTTACT-3'

533

534

535 **Virus production**

536 Virus stocks were obtained by transfecting HEK293T cells (ATCC, Manassas, Virginia) with viral  
537 DNA and polyethylenimine (PEI). Cells were plated at  $2.5 \times 10^6$  cells per 10cm dish and incubated  
538 overnight. The following day 12  $\mu\text{g}$  of total DNA was combined with 48  $\mu\text{g}$  of PEI, mixed by  
539 vortexing, and added to each plate of cells. For NL4-3 $\Delta$ GPE-GFP cells were transfected with 4  
540  $\mu\text{g}$  viral genome, 4  $\mu\text{g}$  pCMV-HIV, and 4  $\mu\text{g}$  VSV-G plasmid. For SIV3+  $\Delta$ Vpr the cells were  
541 transfected with 10.5  $\mu\text{g}$  of viral genome and 1.5  $\mu\text{g}$  VSV-G plasmid. Viral supernatant was  
542 collected 48 hours post-transfection and centrifuged at 1500 rpm 5 min to remove cellular debris.  
543 SIV3+  $\Delta$ Vpr was pelleted by centrifugation at 14,000 rpm for 4 hours at 4°C and resuspended at  
544 10x concentration. Virus stocks were aliquoted and stored at -80°C.

545

546 **Co-transfections**

547 Co-transfections of HIV and MR were performed in HEK293T cells. Cells were plated at  $1.6 \times 10^5$   
548 per well in a 12-well dish. The following day 100 ng of pcDNA.3.hMR, 250 ng of NL4-3  $\Delta$ GPE-  
549 GFP, and 750 ng pUC19 plasmid was combined with 4.4 $\mu\text{g}$  PEI, mixed by vortexing, and added  
550 to each well. Cells were lifted using enzyme free cell dissociation buffer (ThermoFisher, cat #  
551 12151014) 48 hours later and analyzed by flow cytometry.

552

553 **HIV infections of MDM**

554 Prior to infection, 500 $\mu\text{L}$  of medium was removed from each well and this “conditioned” medium  
555 was saved to be replaced after the infection. MDM were infected by equal inocula of HIV as  
556 measured by Gag p24 mass in 500 $\mu\text{L}$  of R10 for 6 hours at 37°C. After 6 hours, infection medium  
557 was removed and replaced with a 1:2 mixture of conditioned medium and fresh R10. Where  
558 indicated, HIV spread was blocked by AMD3100 (10 $\mu\text{g}/\text{mL}$ , AIDS Reagent Program cat# 8128)  
559 and/or Maraviroc (20 $\mu\text{M}$ , AIDS Reagent Program cat# 11580).

560

561 **Spin transduction of MDM with NL4-3  $\Delta$ GPE-GFP**

562 MDM were centrifuged at 2500rpm for 2 hours at 25°C with equal volume of NL4-3  $\Delta$ GPE-GFP  
563 or an isogenic mutant in 500uL total medium. Following infection, medium was removed and  
564 replaced with a 1:2 mixture of conditioned medium and fresh R10.

565

566 **Adenoviral transduction of MDM**

567 Adenovirus was prepared by the University of Michigan Vector Core, and the transduction of MDM  
568 was performed as previously described (Leonard, Filzen et al. 2011) at an MOI of 1000 based on  
569 HEK293T cell infection estimations and the concentration of particles as assessed by OD<sub>280</sub>.

570

571 **Infection of T cells**

572 Activated T cells were infected by three methods as indicated. For direct infection, 5 x10<sup>5</sup> cells  
573 were plated per well with 50µg HIV p24 in 500µL R10 +100IU/mL of IL-2 and incubated at 37°C  
574 for 48 hours. For spin infection, 5x10<sup>5</sup> cells were plated per well with 50µg HIV and 4ng/mL  
575 polybrene in 500µL R10 +100IU/mL of IL-2 and centrifuged at 2500rpm for 2 hours at 25°C. After  
576 both types of infection, medium was removed and replaced with 1mL R10 +100IU/mL of IL-2. For  
577 co-culture with autologous, infected MDM medium was removed from MDM wells and 5 x10<sup>5</sup> T  
578 cells were added in 1mL R10 +100IU/mL of IL-2. All T cell infections were collected 48 hours post  
579 infection.

580

581 **Flow cytometry**

582 Intracellular staining of cells using antibodies directed against HIV Gag p24 and MR was  
583 performed by permeabilizing PFA-fixed cells with 0.1% Triton-X in PBS for 5 min, followed by  
584 incubation with PE-conjugated antibody for 20 minutes at room temperature. Surface staining for  
585 CD4, CD3 and CD14 was performed before fixation as described previously (Collins, Lubow et  
586 al. 2015). Flow cytometric data was acquired using a FACSCanto instrument with FACSDiva



587 collection software (BD, Franklin Lakes, New Jersey) or a FACScan (Cytex, BD) with FlowJo  
588 software (TreeStar, Ashland, Oregon) and analyzed using FlowJo software. Live NL4-3  $\Delta$ GPE-  
589 GFP transduced cells were sorted using a FACSAria III (BD) and gating on GFP<sup>+</sup> cells.

590

### 591 **Quantitative RT-PCR**

592 MDM sorted as described above in “Flow cytometry” were collected into tubes containing RLT  
593 buffer (Qiagen, Hilden, Germany) and RNA was isolated using RNeasy Kit (Qiagen) with on-  
594 column DNase I digestion. RNA was reverse transcribed using qScript cDNA SuperMix (Cat  
595 #95048, Quantabio, Beverly, Massachusetts). Quantitative PCR was performed using TaqMan  
596 Gene Expression MasterMix (ThermoFisher, cat# 4369016) on an Applied Biosystems 7300 Real-  
597 Time PCR System using TaqMan Gene Expression primers with FAM-MGB probe. The primers  
598 for *ACTB* are assay Hs99999903 and for *MRC1* are assay Hs00267207 (ThermoFisher).  
599 Reactions were quantified using ABI Sequence Detection software compared to serial dilutions  
600 of cDNA from mock-treated cells. Measured values for *MRC1* were normalized to measured  
601 values of *ACTB*.

602

### 603 **Immunoblot**

604 MDM cultures were lysed in Blue Loading Buffer (Cell Signaling Technologies, Danvers,  
605 Massachusetts), sonicated with a Misonix sonicator (Qsonica, LLC., Newtown, Connecticut) and  
606 clarified by centrifugation at 8000 RPM for 3 minutes. Lysates were analyzed by SDS-PAGE  
607 immunoblot. The proteins MR, GAPDH and pr55 were visualized using AlexFluor-647 conjugated  
608 secondary antibodies on a Typhoon FLA 9500 scanner (GE, Boston, Massachusetts) and  
609 quantified using ImageQL (GE). The proteins gp160, gp120, gp41, Nef, Vpr and GFP were  
610 visualized using HRP-conjugated secondary antibodies on film. Immunoblot films were scanned  
611 and the mean intensity of each band, minus the background, was calculated using the histogram  
612 function of Photoshop CC (Adobe, San Jose, California).

613 **Virion Quantitation**

614 Supernatant containing viral particles was lysed in Triton X lysis buffer (0.05% Tween 20, 0.5%  
615 Triton X-100, 0.5% casein in PBS). CAp24 antibody (clone 183-H12-5C) was bound to Nunc  
616 MaxiSorp plates (ThermoFisher) at 4°C overnight. Lysed samples were captured for 2 hr and then  
617 incubated with biotinylated antibody to CAp24 (clone 31-90-25) for 1 hr. Clone 31-90-25 was  
618 biotinylated with the EZ-Link Micro Sulfo-NHS-Biotinylation Kit (Pierce, ThermoFisher). Samples  
619 were detected using streptavidin-HRP (Fitzgerald, Acton, Massachusetts) and 3,3',5,5'-  
620 tetramethylbenzidine substrate. CAp24 concentrations were measured by comparison to  
621 recombinant CAp24 standards (ViroGen, Watertown, Massachusetts).

622

623 **Antibodies**

624 Antibodies to CAp24 (clone KC57-PE, cat# 6604667, Beckman Coulter, Brea, California), CD3  
625 (clone OKT3-Pacific Blue, cat# 317313, BioLegend, San Diego, California), CD14 (clone HCD14-  
626 APC, cat# 325608, BioLegend), CD4 (clone OKT4, cat#17-0048-42, Invitrogen,  
627 ThermoScientific), and MR (clone 19.2-PE, cat# 555954, BD) were used for flow cytometry.  
628 Antibodies to the following proteins were used for immunoblot analysis: MR (cat# ab64693,  
629 Abcam, Cambridge, Massachusetts), GAPDH (clone 3C2, cat# H00002597-M01, Abnova, Taipei,  
630 Taiwan), Gag pr55 (HIV-Ig AIDS Reagent Program cat# 3957), Env gp160/120 (AIDS Reagent  
631 Program Cat# 288 from Dr. Michael Phelan) Env gp41 (AIDS Reagent Program cat# 11557 from  
632 Dr. Michael Zwick), Vpr (AIDS Reagent Program cat# 3951 from Dr. Jeffrey Kopp). Neutralizing  
633 antibody 2G12 (AIDS Reagent Program cat# 1476 from Dr. Hermann Katinger) was used at a 1  
634 µg/ml for at the time of infection.

635 **Acknowledgments**

636 This research was supported by the NIH (5T32GM008353-27 to J.L., R01AI046998 to K.L.C.,  
637 R56AI130004 to K.L.C., R21AI32379 to K.L.C., T32GM007863 to M.M., T32AI007413 to M.M.  
638 and T32AI007528 to D.R.C.). We are grateful to the University of Michigan Vector Core and the  
639 NIH AIDS Reagent Program for reagents.

640

641 **Competing Interests**

642

643 No competing interests exist.

644

645

## References

- 646  
647  
648 Aiken, C., J. Konner, N. R. Landau, M. E. Lenburg and D. Trono (1994). "Nef induces  
649 CD4 endocytosis: requirement for a critical dileucine motif in the membrane-proximal  
650 CD4 cytoplasmic domain." Cell **76**(5): 853-864.
- 651 Balliet, J. W., D. L. Kolson, G. Eiger, F. M. Kim, K. A. McGann, A. Srinivasan and R.  
652 Collman (1994). "Distinct effects in primary macrophages and lymphocytes of the  
653 human immunodeficiency virus type 1 accessory genes vpr, vpu, and nef: mutational  
654 analysis of a primary HIV-1 isolate." Virology **200**(2): 623-631.
- 655 Balzarini, J. (2007). "Targeting the glycans of glycoproteins: a novel paradigm for  
656 antiviral therapy." Nat Rev Microbiol **5**(8): 583-597.
- 657 Belzile, J. P., G. Duisit, N. Rougeau, J. Mercier, A. Finzi and E. A. Cohen (2007). "HIV-1  
658 Vpr-mediated G2 arrest involves the DDB1-CUL4AVPRBP E3 ubiquitin ligase." PLoS  
659 Pathog **3**(7): e85.
- 660 Bresnahan, P. A., W. Yonemoto, S. Ferrell, D. Williams-Herman, R. Geleziunas and W.  
661 C. Greene (1998). "A dileucine motif in HIV-1 Nef acts as an internalization signal for  
662 CD4 downregulation and binds the AP-1 clathrin adaptor." Curr Biol **8**(22): 1235-1238.
- 663 Caldwell, R. L., B. S. Egan and V. L. Shepherd (2000). "HIV-1 Tat represses  
664 transcription from the mannose receptor promoter." J Immunol **165**(12): 7035-7041.
- 665 Chen, B. K., R. T. Gandhi and D. Baltimore (1996). "CD4 down-modulation during  
666 infection of human T cells with human immunodeficiency virus type 1 involves  
667 independent activities of vpu, env, and nef." J Virol **70**(9): 6044-6053.
- 668 Cluet, D., C. Bertsch, C. Beyer, L. Gloeckler, M. Erhardt, J. P. Gut, J. L. Galzi and A. M.  
669 Aubertin (2005). "Detection of human immunodeficiency virus type 1 Nef and CD4  
670 physical interaction in living human cells by using bioluminescence resonance energy  
671 transfer." J Virol **79**(13): 8629-8636.
- 672 Cohen, E. A., G. Dehni, J. G. Sodroski and W. A. Haseltine (1990). "Human  
673 immunodeficiency virus vpr product is a virion-associated regulatory protein." J Virol  
674 **64**(6): 3097-3099.
- 675 Collins, D. R., J. Lubow, Z. Lukic, M. Mashiba and K. L. Collins (2015). "Vpr Promotes  
676 Macrophage-Dependent HIV-1 Infection of CD4+ T Lymphocytes." PLoS Pathog **11**(7):  
677 e1005054.
- 678 Collman, R., J. W. Balliet, S. A. Gregory, H. Friedman, D. L. Kolson, N. Nathanson and  
679 A. Srinivasan (1992). "An infectious molecular clone of an unusual macrophage-tropic  
680 and highly cytopathic strain of human immunodeficiency virus type 1." J Virol **66**(12):  
681 7517-7521.

- 682 Connor, R. I., B. K. Chen, S. Choe and N. R. Landau (1995). "Vpr is required for  
683 efficient replication of human immunodeficiency virus type-1 in mononuclear  
684 phagocytes." Virology **206**(2): 935-944.
- 685 Coss, K. P., S. Vasiljevic, L. K. Pritchard, S. A. Krumm, M. Glaze, S. Madzorera, P. L.  
686 Moore, M. Crispin and K. J. Doores (2016). "HIV-1 Glycan Density Drives the  
687 Persistence of the Mannose Patch within an Infected Individual." J Virol **90**(24): 11132-  
688 11144.
- 689 Eckstein, D. A., M. P. Sherman, M. L. Penn, P. S. Chin, C. M. De Noronha, W. C.  
690 Greene and M. A. Goldsmith (2001). "HIV-1 Vpr enhances viral burden by facilitating  
691 infection of tissue macrophages but not nondividing CD4+ T cells." J Exp Med **194**(10):  
692 1407-1419.
- 693 Fanibunda, S. E., S. M. Velhal, V. P. Raghavan and A. H. Bandivdekar (2008). "CD4  
694 independent binding of HIV gp120 to mannose receptor on human spermatozoa." J  
695 Acquir Immune Defic Syndr **48**(4): 389-397.
- 696 Greenberg, M., L. DeTulleo, I. Rapoport, J. Skowronski and T. Kirchhausen (1998). "A  
697 dileucine motif in HIV-1 Nef is essential for sorting into clathrin-coated pits and for  
698 downregulation of CD4." Curr Biol **8**(22): 1239-1242.
- 699 Harris, R. S., J. F. Hultquist and D. T. Evans (2012). "The restriction factors of human  
700 immunodeficiency virus." J Biol Chem **287**(49): 40875-40883.
- 701 Hoch, J., S. M. Lang, M. Weeger, C. Stahl-Hennig, C. Coulibaly, U. Dittmer, G.  
702 Hunsmann, D. Fuchs, J. Muller, S. Sopper and et al. (1995). "vpr deletion mutant of  
703 simian immunodeficiency virus induces AIDS in rhesus monkeys." J Virol **69**(8): 4807-  
704 4813.
- 705 Holder, G. E., C. M. McGary, E. M. Johnson, R. Zheng, V. T. John, C. Sugimoto, M. J.  
706 Kuroda and W. K. Kim (2014). "Expression of the mannose receptor CD206 in HIV and  
707 SIV encephalitis: a phenotypic switch of brain perivascular macrophages with virus  
708 infection." J Neuroimmune Pharmacol **9**(5): 716-726.
- 709 Hrecka, K., M. Gierszewska, S. Srivastava, L. Kozackiewicz, S. K. Swanson, L.  
710 Florens, M. P. Washburn and J. Skowronski (2007). "Lentiviral Vpr usurps Cul4-  
711 DDB1[VprBP] E3 ubiquitin ligase to modulate cell cycle." Proc Natl Acad Sci U S A  
712 **104**(28): 11778-11783.
- 713 Huang, J., B. H. Kang, M. Pancera, J. H. Lee, T. Tong, Y. Feng, H. Imamichi, I. S.  
714 Georgiev, G. Y. Chuang, A. Druz, N. A. Doria-Rose, L. Laub, K. Slieden, M. J. van Gils,  
715 A. T. de la Pena, R. Derking, P. J. Klasse, S. A. Migueles, R. T. Bailer, M. Alam, P.  
716 Pugach, B. F. Haynes, R. T. Wyatt, R. W. Sanders, J. M. Binley, A. B. Ward, J. R.  
717 Mascola, P. D. Kwong and M. Connors (2014). "Broad and potent HIV-1 neutralization  
718 by a human antibody that binds the gp41-gp120 interface." Nature **515**(7525): 138-142.

- 719 Iyer, S. S., F. Bibollet-Ruche, S. Sherrill-Mix, G. H. Learn, L. Plenderleith, A. G. Smith,  
720 H. J. Barbian, R. M. Russell, M. V. Gondim, C. Y. Bahari, C. M. Shaw, Y. Li, T. Decker,  
721 B. F. Haynes, G. M. Shaw, P. M. Sharp, P. Borrow and B. H. Hahn (2017). "Resistance  
722 to type 1 interferons is a major determinant of HIV-1 transmission fitness." Proc Natl  
723 Acad Sci U S A **114**(4): E590-E599.
- 724 Koziel, H., Q. Eichbaum, B. A. Kruskal, P. Pinkston, R. A. Rogers, M. Y. Armstrong, F.  
725 F. Richards, R. M. Rose and R. A. Ezekowitz (1998). "Reduced binding and  
726 phagocytosis of *Pneumocystis carinii* by alveolar macrophages from persons infected  
727 with HIV-1 correlates with mannose receptor downregulation." J Clin Invest **102**(7):  
728 1332-1344.
- 729 Koziel, H., B. A. Kruskal, R. A. Ezekowitz and R. M. Rose (1993). "HIV impairs alveolar  
730 macrophage mannose receptor function against *Pneumocystis carinii*." Chest **103**(2  
731 Suppl): 111S-112S.
- 732 Laguette, N., C. Bregnard, P. Hue, J. Basbous, A. Yatim, M. Larroque, F. Kirchhoff, A.  
733 Constantinou, B. Sobhian and M. Benkirane (2014). "Premature activation of the SLX4  
734 complex by Vpr promotes G2/M arrest and escape from innate immune sensing." Cell  
735 **156**(1-2): 134-145.
- 736 Lahouassa, H., M. L. Blondot, L. Chauveau, G. Chougui, M. Morel, M. Leduc, F.  
737 Guillonnet, B. C. Ramirez, O. Schwartz and F. Margottin-Goguet (2016). "HIV-1 Vpr  
738 degrades the HLTF DNA translocase in T cells and macrophages." Proc Natl Acad Sci  
739 U S A **113**(19): 5311-5316.
- 740 Lai, J., O. K. Bernhard, S. G. Turville, A. N. Harman, J. Wilkinson and A. L. Cunningham  
741 (2009). "Oligomerization of the macrophage mannose receptor enhances gp120-  
742 mediated binding of HIV-1." J Biol Chem **284**(17): 11027-11038.
- 743 Lama, J., A. Mangasarian and D. Trono (1999). "Cell-surface expression of CD4  
744 reduces HIV-1 infectivity by blocking Env incorporation in a Nef- and Vpu-inhibitable  
745 manner." Curr Biol **9**(12): 622-631.
- 746 Le Rouzic, E., N. Belaidouni, E. Estrabaud, M. Morel, J. C. Rain, C. Transy and F.  
747 Margottin-Goguet (2007). "HIV1 Vpr arrests the cell cycle by recruiting DCAF1/VprBP, a  
748 receptor of the Cul4-DDB1 ubiquitin ligase." Cell Cycle **6**(2): 182-188.
- 749 Leonard, C. K., M. W. Spellman, L. Riddle, R. J. Harris, J. N. Thomas and T. J. Gregory  
750 (1990). "Assignment of intrachain disulfide bonds and characterization of potential  
751 glycosylation sites of the type 1 recombinant human immunodeficiency virus envelope  
752 glycoprotein (gp120) expressed in Chinese hamster ovary cells." J Biol Chem **265**(18):  
753 10373-10382.
- 754 Leonard, J. A., T. Filzen, C. C. Carter, M. Schaefer and K. L. Collins (2011). "HIV-1 Nef  
755 disrupts intracellular trafficking of major histocompatibility complex class I, CD4, CD8,  
756 and CD28 by distinct pathways that share common elements." J Virol **85**(14): 6867-  
757 6881.

- 758 Li, Y., J. C. Kappes, J. A. Conway, R. W. Price, G. M. Shaw and B. H. Hahn (1991).  
759 "Molecular characterization of human immunodeficiency virus type 1 cloned directly  
760 from uncultured human brain tissue: identification of replication-competent and -  
761 defective viral genomes." J Virol **65**(8): 3973-3985.
- 762 Liang, W. W., X. Shi, D. Deshpande, C. J. Malanga and Y. Rojanasakul (1996).  
763 "Oligonucleotide targeting to alveolar macrophages by mannose receptor-mediated  
764 endocytosis." Biochim Biophys Acta **1279**(2): 227-234.
- 765 Liao, F., R. L. Rabin, C. S. Smith, G. Sharma, T. B. Nutman and J. M. Farber (1999).  
766 "CC-chemokine receptor 6 is expressed on diverse memory subsets of T cells and  
767 determines responsiveness to macrophage inflammatory protein 3 alpha." J Immunol  
768 **162**(1): 186-194.
- 769 Linehan, S. A., L. Martinez-Pomares, P. D. Stahl and S. Gordon (1999). "Mannose  
770 receptor and its putative ligands in normal murine lymphoid and nonlymphoid organs: In  
771 situ expression of mannose receptor by selected macrophages, endothelial cells,  
772 perivascular microglia, and mesangial cells, but not dendritic cells." J Exp Med **189**(12):  
773 1961-1972.
- 774 Liu, Y., H. Liu, B. O. Kim, V. H. Gattone, J. Li, A. Nath, J. Blum and J. J. He (2004).  
775 "CD4-independent infection of astrocytes by human immunodeficiency virus type 1:  
776 requirement for the human mannose receptor." J Virol **78**(8): 4120-4133.
- 777 Lu, Y. L., P. Spearman and L. Ratner (1993). "Human immunodeficiency virus type 1  
778 viral protein R localization in infected cells and virions." J Virol **67**(11): 6542-6550.
- 779 Macedo-Ramos, H., A. F. Batista, A. Carrier-Ruiz, L. Alves, S. Allodi, V. T. Ribeiro-  
780 Resende, L. M. Teixeira and W. Baetas-da-Cruz (2014). "Evidence of involvement of  
781 the mannose receptor in the internalization of *Streptococcus pneumoniae* by Schwann  
782 cells." BMC Microbiol **14**: 211.
- 783 Mashiba, M., D. R. Collins, V. H. Terry and K. L. Collins (2014). "Vpr overcomes  
784 macrophage-specific restriction of HIV-1 Env expression and virion production." Cell  
785 Host Microbe **16**(6): 722-735.
- 786 Mashiba, M. and K. L. Collins (2013). "Molecular mechanisms of HIV immune evasion  
787 of the innate immune response in myeloid cells." Viruses **5**(1): 1-14.
- 788 McCall, C. M., P. L. Miliiani de Marval, P. D. Chastain, 2nd, S. C. Jackson, Y. J. He, Y.  
789 Kotake, J. G. Cook and Y. Xiong (2008). "Human immunodeficiency virus type 1 Vpr-  
790 binding protein VprBP, a WD40 protein associated with the DDB1-CUL4 E3 ubiquitin  
791 ligase, is essential for DNA replication and embryonic development." Mol Cell Biol  
792 **28**(18): 5621-5633.
- 793 McGreal, E. P., M. Rosas, G. D. Brown, S. Zamze, S. Y. Wong, S. Gordon, L. Martinez-  
794 Pomares and P. R. Taylor (2006). "The carbohydrate-recognition domain of Dectin-2 is  
795 a C-type lectin with specificity for high mannose." Glycobiology **16**(5): 422-430.

- 796 McNamara, L. A., J. A. Ganesh and K. L. Collins (2012). "Latent HIV-1 infection occurs  
797 in multiple subsets of hematopoietic progenitor cells and is reversed by NF-kappaB  
798 activation." J Virol **86**(17): 9337-9350.
- 799 Michel, N., I. Allespach, S. Venzke, O. T. Fackler and O. T. Keppler (2005). "The Nef  
800 protein of human immunodeficiency virus establishes superinfection immunity by a dual  
801 strategy to downregulate cell-surface CCR5 and CD4." Curr Biol **15**(8): 714-723.
- 802 Michel, N., K. Ganter, S. Venzke, J. Bitzegeio, O. T. Fackler and O. T. Keppler (2006).  
803 "The Nef protein of human immunodeficiency virus is a broad-spectrum modulator of  
804 chemokine receptor cell surface levels that acts independently of classical motifs for  
805 receptor endocytosis and Galphai signaling." Mol Biol Cell **17**(8): 3578-3590.
- 806 Nguyen, D. G. and J. E. Hildreth (2003). "Involvement of macrophage mannose  
807 receptor in the binding and transmission of HIV by macrophages." Eur J Immunol **33**(2):  
808 483-493.
- 809 Ochsenbauer, C., T. G. Edmonds, H. Ding, B. F. Keele, J. Decker, M. G. Salazar, J. F.  
810 Salazar-Gonzalez, R. Shattock, B. F. Haynes, G. M. Shaw, B. H. Hahn and J. C.  
811 Kappes (2012). "Generation of transmitted/founder HIV-1 infectious molecular clones  
812 and characterization of their replication capacity in CD4 T lymphocytes and monocyte-  
813 derived macrophages." J Virol **86**(5): 2715-2728.
- 814 Pertel, T., C. Reinhard and J. Luban (2011). "Vpx rescues HIV-1 transduction of  
815 dendritic cells from the antiviral state established by type 1 interferon." Retrovirology **8**:  
816 49.
- 817 Peters, P. J., M. P. Gonzalez-Perez, T. Musich, T. A. Moore Simas, R. Lin, A. N. Morse,  
818 R. J. Shattock, C. A. Derdeyn and P. R. Clapham (2015). "Infection of ectocervical  
819 tissue and universal targeting of T-cells mediated by primary non-macrophage-tropic  
820 and highly macrophage-tropic HIV-1 R5 envelopes." Retrovirology **12**: 48.
- 821 Pritchard, L. K., D. I. Spencer, L. Royle, C. Bonomelli, G. E. Seabright, A. J. Behrens, D.  
822 W. Kulp, S. Menis, S. A. Krumm, D. C. Dunlop, D. J. Crispin, T. A. Bowden, C. N.  
823 Scanlan, A. B. Ward, W. R. Schief, K. J. Doores and M. Crispin (2015). "Glycan  
824 clustering stabilizes the mannose patch of HIV-1 and preserves vulnerability to broadly  
825 neutralizing antibodies." Nat Commun **6**: 7479.
- 826 Reading, C. L., E. E. Penhoet and C. E. Ballou (1978). "Carbohydrate structure of  
827 vesicular stomatitis virus glycoprotein." J Biol Chem **253**(16): 5600-5612.
- 828 Ross, T. M., A. E. Oran and B. R. Cullen (1999). "Inhibition of HIV-1 progeny virion  
829 release by cell-surface CD4 is relieved by expression of the viral Nef protein." Curr Biol  
830 **9**(12): 613-621.
- 831 Rucker, E., J. C. Grivel, J. Munch, F. Kirchhoff and L. Margolis (2004). "Vpr and Vpu are  
832 important for efficient human immunodeficiency virus type 1 replication and CD4+ T-cell  
833 depletion in human lymphoid tissue ex vivo." J Virol **78**(22): 12689-12693.



- 834 Sanders, R. W., M. Venturi, L. Schiffner, R. Kalyanaraman, H. Katinger, K. O. Lloyd, P.  
835 D. Kwong and J. P. Moore (2002). "The mannose-dependent epitope for neutralizing  
836 antibody 2G12 on human immunodeficiency virus type 1 glycoprotein gp120." J Virol  
837 **76**(14): 7293-7305.
- 838 Scanlan, C. N., R. Pantophlet, M. R. Wormald, E. Ollmann Saphire, R. Stanfield, I. A.  
839 Wilson, H. Katinger, R. A. Dwek, P. M. Rudd and D. R. Burton (2002). "The broadly  
840 neutralizing anti-human immunodeficiency virus type 1 antibody 2G12 recognizes a  
841 cluster of alpha1-->2 mannose residues on the outer face of gp120." J Virol **76**(14):  
842 7306-7321.
- 843 Schrofelbauer, B., Y. Hakata and N. R. Landau (2007). "HIV-1 Vpr function is mediated  
844 by interaction with the damage-specific DNA-binding protein DDB1." Proc Natl Acad Sci  
845 U S A **104**(10): 4130-4135.
- 846 Schrofelbauer, B., Q. Yu, S. G. Zeitlin and N. R. Landau (2005). "Human  
847 immunodeficiency virus type 1 Vpr induces the degradation of the UNG and SMUG  
848 uracil-DNA glycosylases." J Virol **79**(17): 10978-10987.
- 849 Shen, R., H. E. Richter, R. H. Clements, L. Novak, K. Huff, D. Bimczok, S. Sankaran-  
850 Walters, S. Dandekar, P. R. Clapham, L. E. Smythies and P. D. Smith (2009).  
851 "Macrophages in vaginal but not intestinal mucosa are monocyte-like and permissive to  
852 human immunodeficiency virus type 1 infection." J Virol **83**(7): 3258-3267.
- 853 Shibata, Y., W. J. Metzger and Q. N. Myrvik (1997). "Chitin particle-induced cell-  
854 mediated immunity is inhibited by soluble mannan: mannose receptor-mediated  
855 phagocytosis initiates IL-12 production." J Immunol **159**(5): 2462-2467.
- 856 Stahl, P., P. H. Schlesinger, E. Sigardson, J. S. Rodman and Y. C. Lee (1980).  
857 "Receptor-mediated pinocytosis of mannose glycoconjugates by macrophages:  
858 characterization and evidence for receptor recycling." Cell **19**(1): 207-215.
- 859 Stahl, P. D. and R. A. Ezekowitz (1998). "The mannose receptor is a pattern recognition  
860 receptor involved in host defense." Curr Opin Immunol **10**(1): 50-55.
- 861 Stewart-Jones, G. B., C. Soto, T. Lemmin, G. Y. Chuang, A. Druz, R. Kong, P. V.  
862 Thomas, K. Wagh, T. Zhou, A. J. Behrens, T. Bylund, C. W. Choi, J. R. Davison, I. S.  
863 Georgiev, M. G. Joyce, Y. D. Kwon, M. Pancera, J. Taft, Y. Yang, B. Zhang, S. S.  
864 Shivatare, V. S. Shivatare, C. C. Lee, C. Y. Wu, C. A. Bewley, D. R. Burton, W. C. Koff,  
865 M. Connors, M. Crispin, U. Baxa, B. T. Korber, C. H. Wong, J. R. Mascola and P. D.  
866 Kwong (2016). "Trimeric HIV-1-Env Structures Define Glycan Shields from Clades A, B,  
867 and G." Cell **165**(4): 813-826.
- 868 Subramanian, K., D. R. Neill, H. A. Malak, L. Spelmink, S. Khandaker, G. Dalla Libera  
869 Marchiori, E. Dearing, A. Kirby, M. Yang, A. Achour, J. Nilvebrant, P. A. Nygren, L.  
870 Plant, A. Kadioglu and B. Henriques-Normark (2019). "Pneumolysin binds to the  
871 mannose receptor C type 1 (MRC-1) leading to anti-inflammatory responses and  
872 enhanced pneumococcal survival." Nat Microbiol **4**(1): 62-70.

- 873 Sukegawa, S., E. Miyagi, F. Bouamr, H. Farkasova and K. Strebel (2018). "Mannose  
874 Receptor 1 Restricts HIV Particle Release from Infected Macrophages." Cell Rep **22**(3):  
875 786-795.
- 876 Sullivan, N., Y. Sun, J. Li, W. Hofmann and J. Sodroski (1995). "Replicative function and  
877 neutralization sensitivity of envelope glycoproteins from primary and T-cell line-  
878 passaged human immunodeficiency virus type 1 isolates." J Virol **69**(7): 4413-4422.
- 879 Trkola, A., M. Purtscher, T. Muster, C. Ballaun, A. Buchacher, N. Sullivan, K.  
880 Srinivasan, J. Sodroski, J. P. Moore and H. Katinger (1996). "Human monoclonal  
881 antibody 2G12 defines a distinctive neutralization epitope on the gp120 glycoprotein of  
882 human immunodeficiency virus type 1." J Virol **70**(2): 1100-1108.
- 883 Trujillo, J. R., R. Rogers, R. M. Molina, F. Dangond, M. F. McLane, M. Essex and J. D.  
884 Brain (2007). "Noninfectious entry of HIV-1 into peripheral and brain macrophages  
885 mediated by the mannose receptor." Proc Natl Acad Sci U S A **104**(12): 5097-5102.
- 886 Venzke, S., N. Michel, I. Allespach, O. T. Fackler and O. T. Keppler (2006). "Expression  
887 of Nef downregulates CXCR4, the major coreceptor of human immunodeficiency virus,  
888 from the surfaces of target cells and thereby enhances resistance to superinfection." J  
889 Viro **80**(22): 11141-11152.
- 890 Vigerust, D. J., B. S. Egan and V. L. Shepherd (2005). "HIV-1 Nef mediates post-  
891 translational down-regulation and redistribution of the mannose receptor." J Leukoc Biol  
892 **77**(4): 522-534.
- 893 Wen, X., K. M. Duus, T. D. Friedrich and C. M. de Noronha (2007). "The HIV1 protein  
894 Vpr acts to promote G2 cell cycle arrest by engaging a DDB1 and Cullin4A-containing  
895 ubiquitin ligase complex using VprBP/DCAF1 as an adaptor." J Biol Chem **282**(37):  
896 27046-27057.
- 897 Wu, Y., X. Zhou, C. O. Barnes, M. DeLucia, A. E. Cohen, A. M. Gronenborn, J. Ahn and  
898 G. Calero (2016). "The DDB1-DCAF1-Vpr-UNG2 crystal structure reveals how HIV-1  
899 Vpr steers human UNG2 toward destruction." Nat Struct Mol Biol **23**(10): 933-940.
- 900 Zhou, X., M. DeLucia and J. Ahn (2016). "SLX4-SLX1 Protein-independent Down-  
901 regulation of MUS81-EME1 Protein by HIV-1 Viral Protein R (Vpr)." J Biol Chem  
902 **291**(33): 16936-16947.  
903  
904

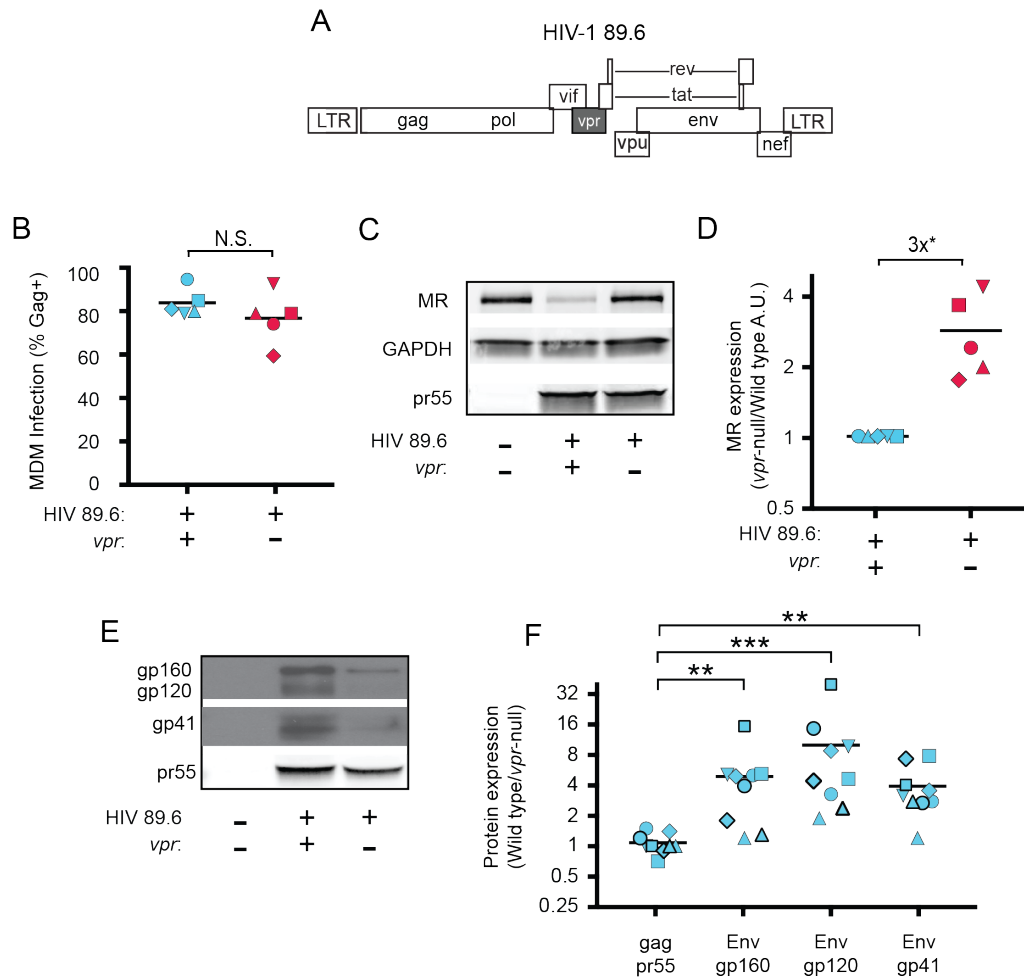

905

906 **Figure 1: HIV Vpr reduces steady state levels of host mannose receptor in MDM and increases steady state**  
 907 **levels of viral Env protein.** A) Diagram of the HIV 89.6 proviral genome. The shaded box shows the location of  
 908 *vpr*, which was disrupted by a frame shift mutation to create the Vpr-null version (Mashiba, Collins et al. 2014). HIV-  
 909 1 89.6 is a dual CXCR4/CCR5-tropic HIV molecular clone isolated from the peripheral blood of an AIDS patient  
 910 (Collman, Balliet et al. 1992). B) Summary graph depicting MDM infected by HIV 89.6 wild type and *vpr*-null with  
 911 matched infection frequencies of at least 50% 10 days post infection as measured flow cytometrically by intracellular  
 912 Gag p24 staining. This subset with high frequencies of infection was selected to examine potential effects on host  
 913 factors. Statistical significance was determined using a two-tailed, paired *t*-test. N.S. – not significant,  $p=0.34$  C)  
 914 Western blot analysis of whole cell lysates from MDM prepared as in B. D) Summary graph displaying relative  
 915 expression of MR in wild type and mutant 89.6 from blots as shown in B. Western blot protein bands were quantified  
 916 using a Typhoon scanner. Values for MR expression in MDM infected with Vpr-null HIV were normalized to GAPDH  
 917 and then to wild type for each donor. Statistical significance was determined using a two-tailed, paired *t*-test. \*  
 918  $p=0.03$  E) Western blot analysis of HIV protein expression in MDM infected as in B. F) Summary graph of HIV  
 919 protein expression from western blot analysis as in E and quantified as described in methods. The ratio of  
 920 expression in wild type to *vpr*-null infection is shown. Data from 9 independent donors with similar frequencies of  
 921 infection (within 2-fold) following ten days of infection are shown. Statistical significance was determined using a  
 922 two-tailed, ratio *t*-test, \*\*  $p<0.01$ , \*\*\*  $p<0.001$ . Data from each donor is represented by the same symbol in all charts.  
 923 Mean values are indicated.

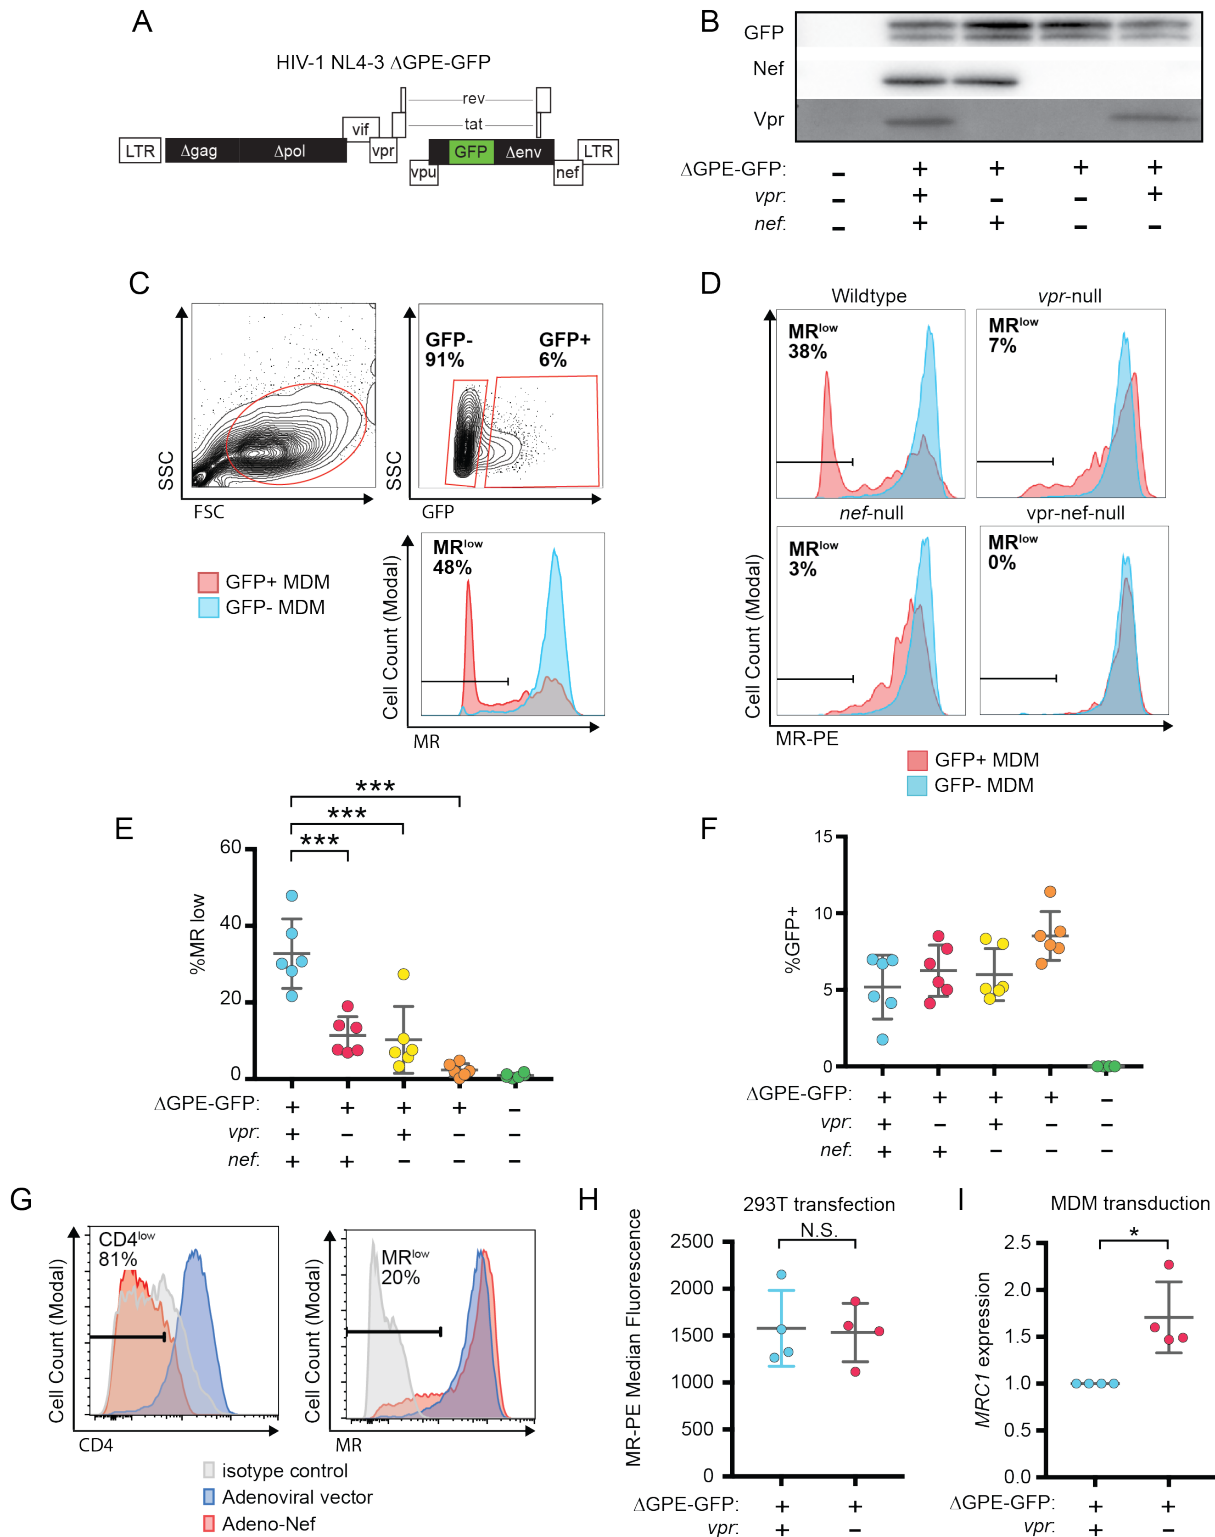

924  
925  
926  
927  
928  
929  
930  
931  
932  
933  
934

**Figure 2: Combined effects of Nef and Vpr completely remove MR from a significant proportion of infected cells at early time points.** A) Diagram of HIV NL4-3  $\Delta$ GPE-GFP. B) Western blot analysis of whole cell lysates from HEK293T cells transfected with the indicated viral expression construct. C) The gating strategy used to identify live GFP<sup>+</sup> vs GFP<sup>-</sup> cells and the fraction of cells that are MR<sup>low</sup>. D) Representative flow cytometric analysis of MDM at five days post transduction by the indicated virus. The percentage of GFP<sup>+</sup> cells that fell into the MR<sup>low</sup> gate is indicated in each panel. E) Summary graph depicting the percentage of GFP<sup>+</sup> cells that fell into the MR<sup>low</sup> gate in transduced MDM. For the uninfected column the GFP<sup>-</sup> cells are displayed. (*n*=6 independent donors) F) Summary graph depicting the frequency of transduced (GFP<sup>+</sup>) MDM at the time of harvest. G) Representative flow cytometric plots of MDM transduced with the indicated adenoviral vector (*n*=3 independent donors). H) Summary graph of MR

935 levels as measured by flow cytometry in HEK293T cells co-transfected with the indicated HIV construct. Transfected  
936 (GFP<sup>+</sup>) cells were identified using the gating strategy shown in Figure S1. (*n*= four independent transfections) I)  
937 Summary graph of mannose receptor (*MRC1*) mRNA expression in MDM transduced with the indicated HIV reporter  
938 and sorted for GFP expression by FACS. Expression of *MRC1* was measured by qRT-PCR and normalized to  
939 *ACTB* and to the wild type transduction. (*n*=4 independent donors). Mean +/- standard deviation is shown. Statistical  
940 significance was determined by a two-tailed, paired *t*-test. N.S. not significant: *p*=0.89, \* *p*=0.03, \*\*\* *p*<0.001,  
941

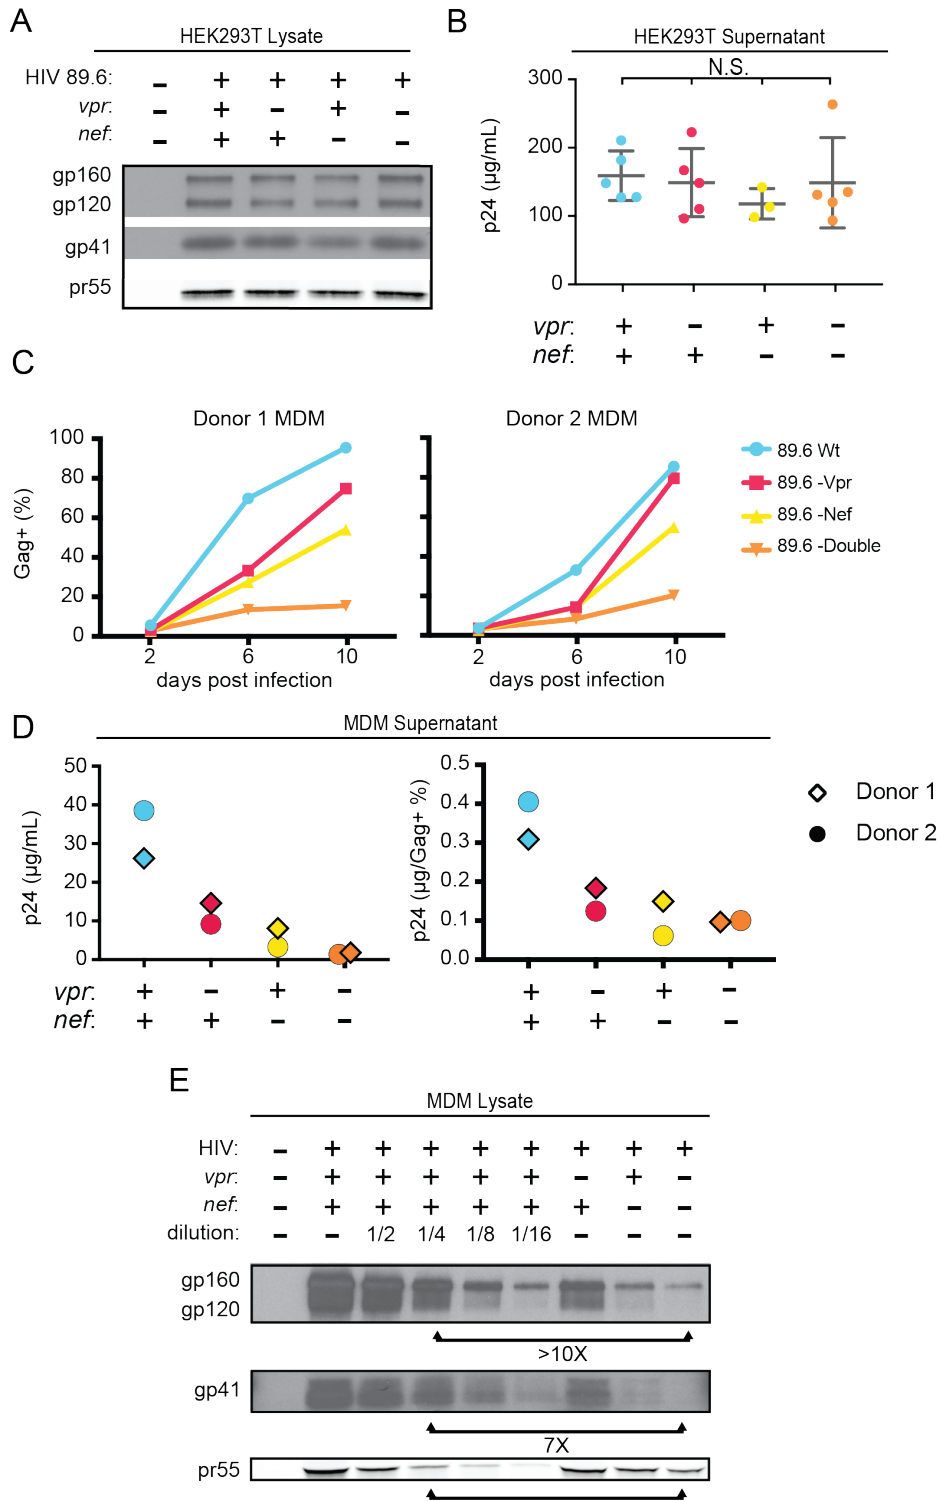

942  
943  
944  
945  
946  
947  
948  
949  
950  
951  
952  
953  
954

**Figure 3: Combined effect of Vpr and Nef dramatically enhances Env levels in primary human MDM.** A) Western blot analysis of whole cell lysate from HEK293T transfected with the indicated HIV construct. B) Summary graph of virion release from HEK293Ts transfected as in A as measured by Gag p24 ELISA. ( $n = 5$  independent transfections). The mean  $\pm$  standard deviation is shown. Statistical significance was determined by one-way ANOVA. (N.S. – not significant) C) Frequency of infected primary human MDM infected with the indicated HIV and analyzed over time by flow cytometric analysis of intracellular Gag. (For parts C-E,  $n = 2$  independent donors). D) Virion release by primary human MDM infected with the indicated HIV and analyzed by Gag p24 ELISA 10 days post infection. In the right panel, virion release was adjusted for frequency of infected cells as measured in part C. E) Western blot analysis of whole cell lysate from primary human MDM infected with the indicated HIV. Lanes 2 - 6 are a serial dilution series of the wild type sample. The arrows below the Gag pr55

955 bands indicate the dilution (4 fold) of wild type that has approximately the same amount of Gag pr55 as the *vpr-*  
956 *nef*-null double mutant.  
957

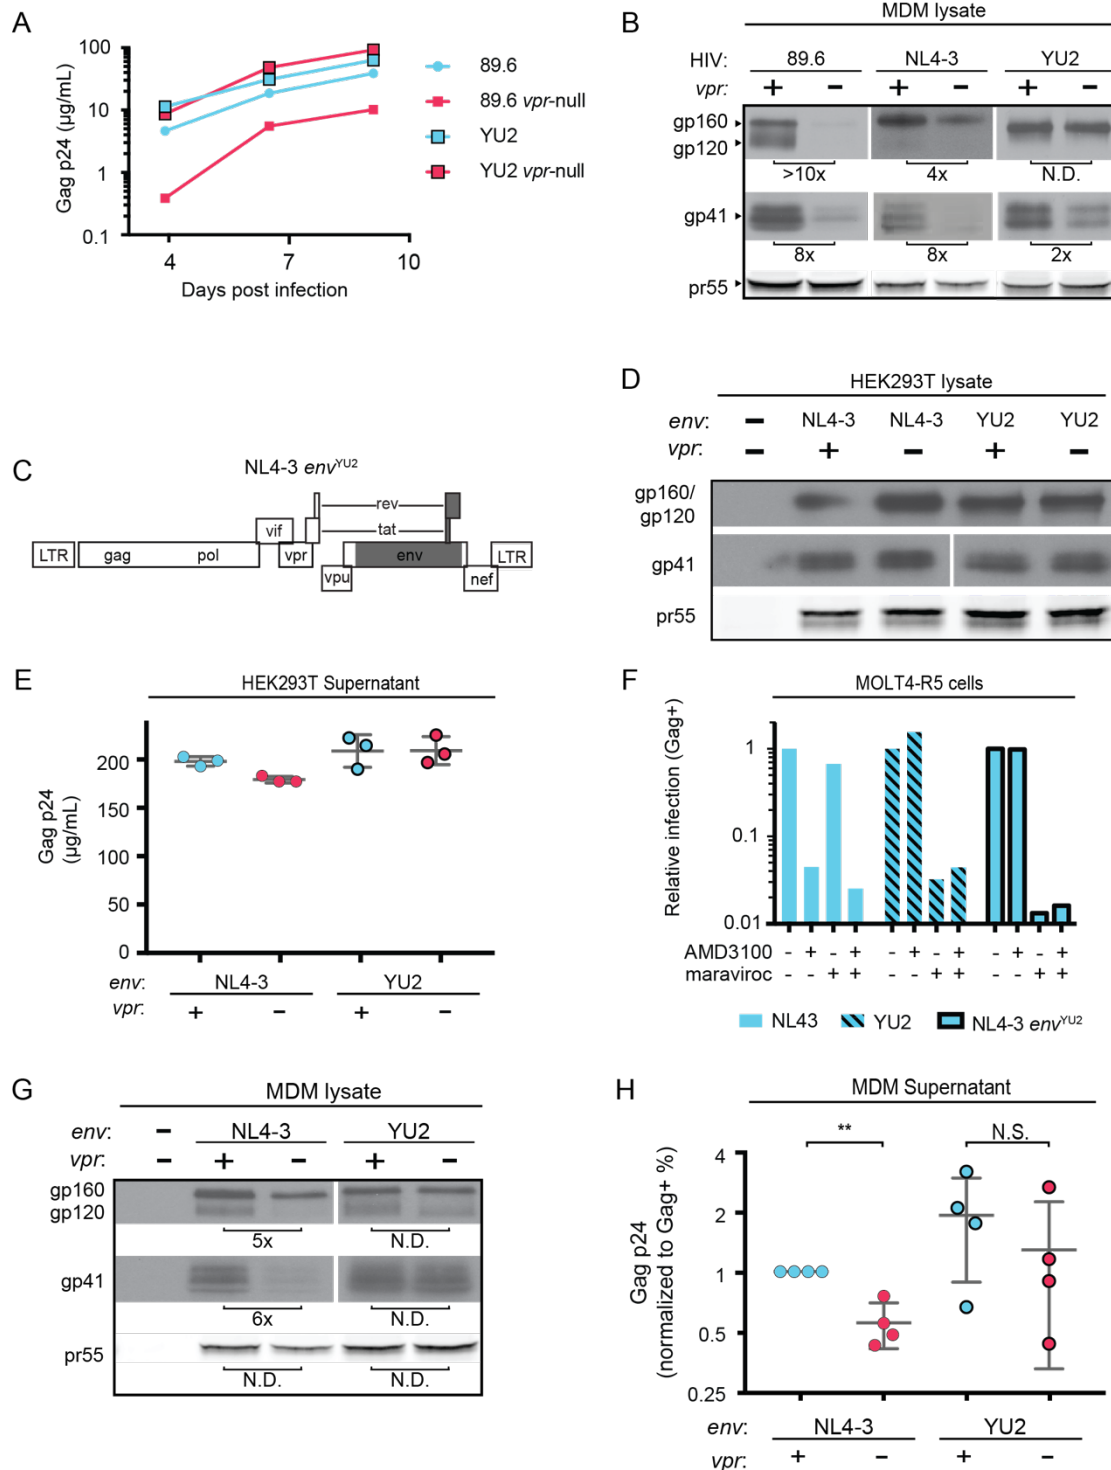

958  
959  
960  
961  
962  
963  
964  
965  
966  
967  
968  
969  
970

**Figure 4: HIV YU2, which lacks a mannose rich patch, does not require Vpr for robust Env protein expression and spread in MDM.** A) Virion release over time by primary human MDM infected with the indicated HIV as measured by ELISA ( $n=2$  independent donors). B) Western blot analysis of whole cell lysate from MDM infected for 10 days with the indicated HIV. Because NL4-3 infects MDM poorly, NL4-3 was pseudotyped with a YU-2 Env expression plasmid co-transfected in the producer cells as described in Methods. Subsequent spread was blocked in all samples by the addition of entry inhibitors AMD3100 and maraviroc 48 hours post-infection. C) Diagram of the HIV NL4-3 genome. The shaded portion represents the sequence that was replaced with sequence from HIV YU2 to create the NL4-3  $env^{YU-2}$  chimera. D) Western blot analysis of HEK293T cells transfected with the indicated HIV constructs. E) Virion release from HEK293T transfected as in E as measured by p24 ELISA. ( $n=3$  experimental replicates). F) Relative infection of MOLT4-R5 cells 48 hours after inoculation by the indicated viruses and treated with entry inhibitors as indicated. The frequency of infected cells was



971 measured by intracellular Gag stain and normalized to the untreated condition for each infection. G) Western blot  
972 analysis of primary human MDM infected for 10 days with the indicated virus as in B. ( $n=2$  independent donors)  
973 H) Summary graph showing virion release as measured by p24 ELISA for primary human MDM infected as in G.  
974 Virus production was adjusted for infection frequency as determined flow cytometrically using an intracellular Gag  
975 stain. The mean +/- standard deviation is shown. ( $n=4$  independent donors). N.D. – no difference. Statistical  
976 significance was determined using a two-tailed, paired  $t$ -test. N.S. – not significant, \*\*  $p<0.01$ .

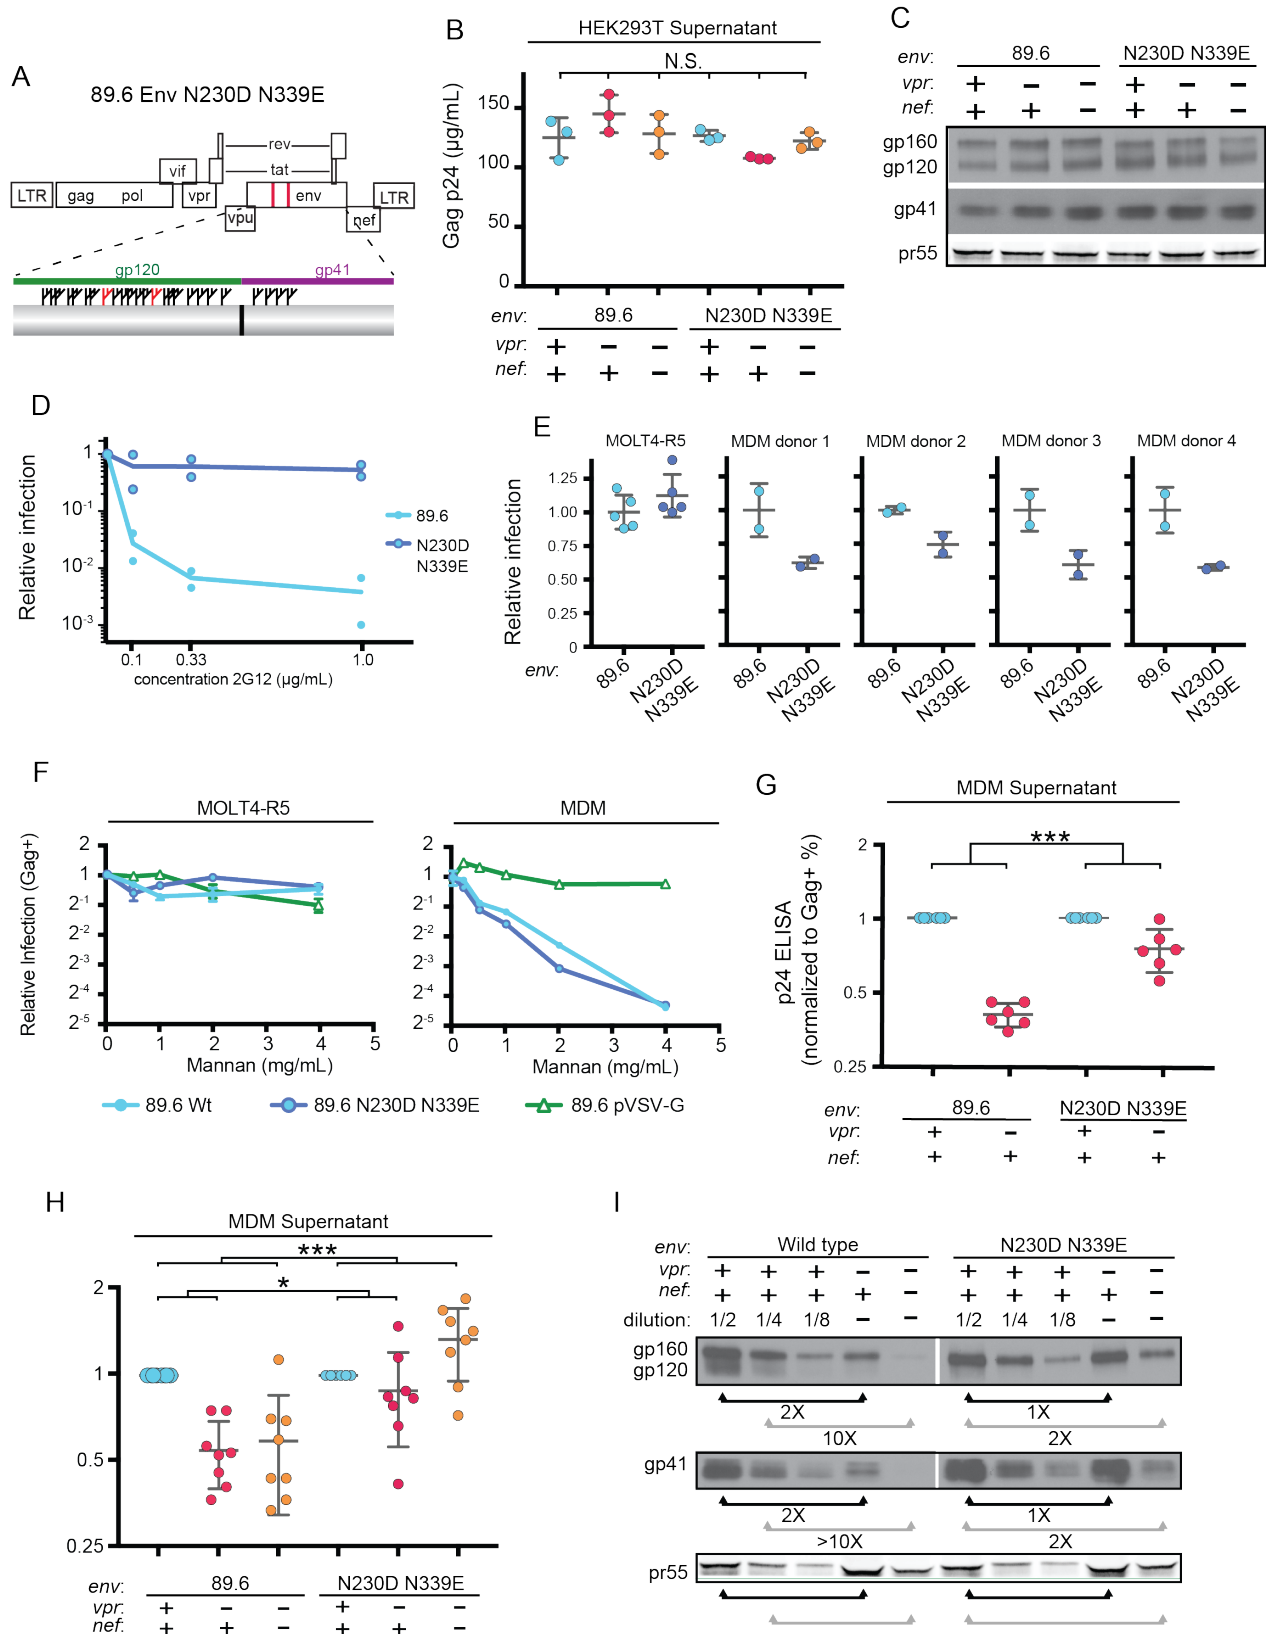

977  
978  
979  
980  
981  
982  
983  
984

**Figure 5: Deletion of N-linked glycosylation sites in env reduces the requirement for Vpr and Nef for virion release and Env expression in HIV-1 infected primary human MDM.** A) Upper panel, diagram of HIV genome encoding the mutations N230D and N339E (indicated in red) to prevent N-linked glycosylation at those sites. Lower panel, diagram of HIV 89.6 N230D N339E mutant Env protein. Branched symbols represent N-linked glycans. B) Summary graph showing virion release from HEK293Ts transfected with the indicated HIV construct as measured by p24 ELISA. ( $n=3$  experimental replicates). Statistical significance was determined by one-way

985 ANOVA. C) Western blot analysis of HEK293T transfected as in B. D) Summary graph showing relative infection  
986 frequency of MOLT4-R5 T cells by the indicated HIV following treatment as indicated with the neutralizing  
987 antibody 2G12. The percentage of infected cells was measured by intracellular Gag stain and normalized to the  
988 untreated condition for each virus. ( $n=2$  independent experiments, both are plotted) E) Summary graphs of  
989 relative infection of the indicated cell type by mutant or parental wild type HIV. The frequency of infected cells was  
990 measured flow cytometrically by intracellular Gag stain and normalized to the wild-type virus. ( $n=5$  experimental  
991 replicates for MOLT4-R5;  $n=2$  experimental replicates for MDM from 4 independent donors). F) Summary graph  
992 depicting relative infection of the indicated cell type by each virus plus or minus increasing concentrations of  
993 mannan as indicated. The frequency of infected cells was measured by intracellular Gag stain and normalized to  
994 the uninhibited (0 mg/mL mannan) condition for each virus. 89.6 pVSV-G indicates 89.6  $\Delta env$  pseudotyped with  
995 VSV-G protein. ( $n=2$  independent donors for 89.6 wild type and 89.6  $\Delta env$  pVSV-G;  $n=1$  donor for 89.6 *env*  
996 N230D N339E) G) Summary graph of virion release from primary human MDM following 10 days of infection by  
997 the indicated HIV as measured by p24 ELISA. Virion release was normalized to the infection frequency assessed  
998 flow cytometrically by intracellular Gag stain. The result for each *vpr*-null mutant was normalized to the *vpr*-  
999 competent virus encoding the same *env*. ( $n=6$  independent donors) H) Summary graph of virion release from  
000 primary human MDM following 10 days of infection by the indicated HIV as measured by p24 ELISA. Virion  
001 release was normalized to the infection frequency assessed flow cytometrically by intracellular Gag stain. For this  
002 single round infection assay, all viruses were pseudotyped with YU2 Env and viral spread was blocked 48 hours  
003 later by addition of AMD3100 and maraviroc. ( $n=8$  independent donors) The result for each *vpr*-null or *vpr-nef*-null  
004 mutant was normalized to the *vpr*- and *nef*-competent virus encoding the same *env*. I) Western blot analysis of  
005 MDM infected as in E. The lysates from the *vpr*-competent and *nef*-competent infections were diluted to facilitate  
006 comparisons to *vpr*- and *nef*-null mutants. ( $n=2$  independent donors) For summary graphs, the means  $\pm$   
007 standard deviation is shown. In panels G and H statistical significance was determined by a two-tailed, paired *t*-  
008 test \*  $p=0.01$ , \*\*  $p<0.01$ , \*\*\*  $p<0.001$ .  
009

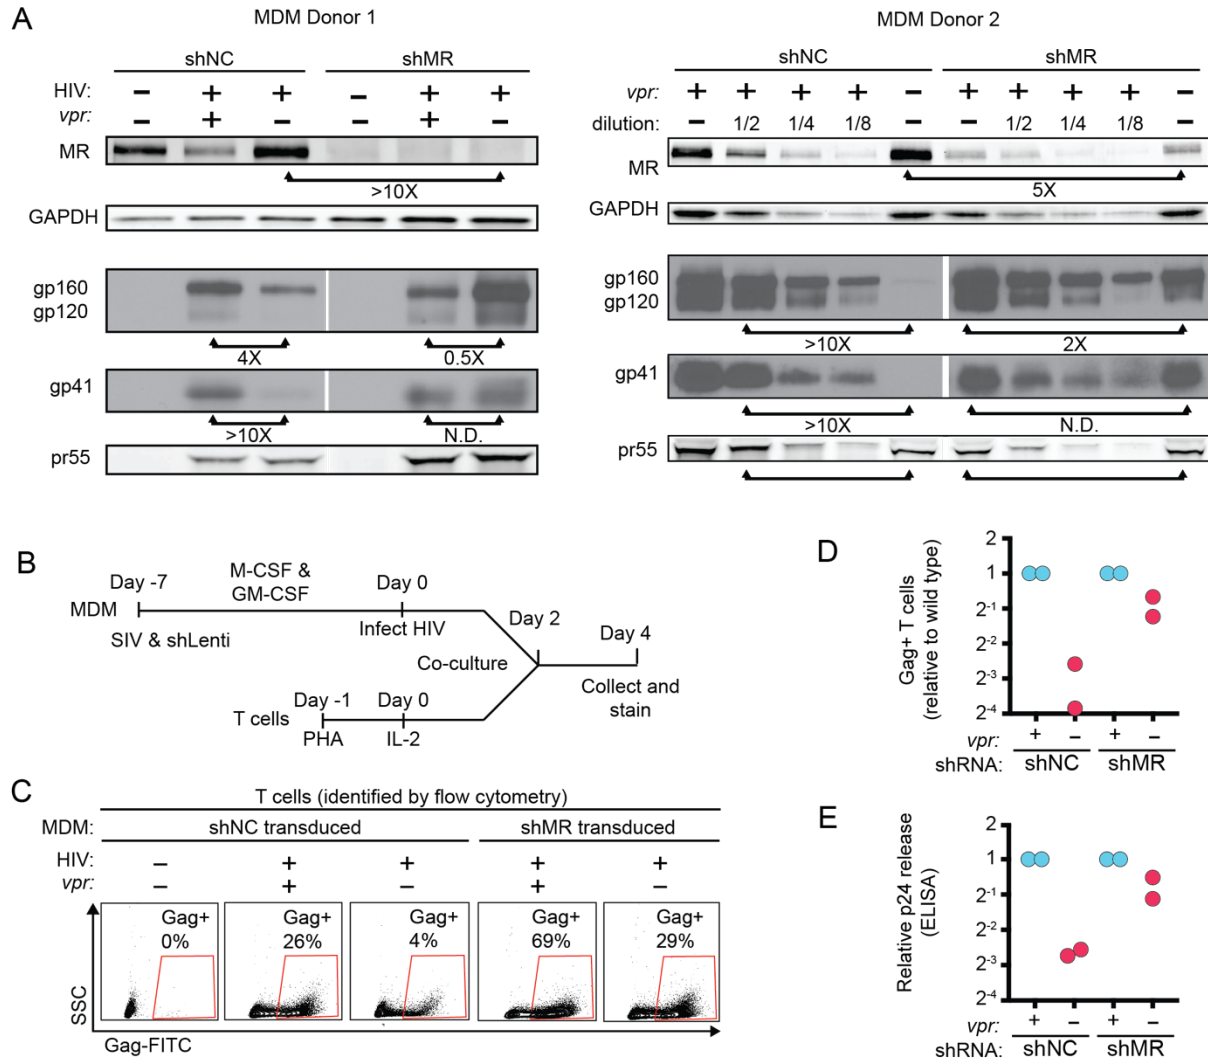

**Figure 6: Knockdown of MR enhances Env expression and spread to T cells in *vpr*-null infection of MDM.**

A) Western blot analysis of MDM from two independent donors treated with the indicated silencing vector and infected with the indicated HIV for 10 days. The miRNA sequences encoded by the negative control vector (shNC) and the MR silencing vector (shMR) are described in Methods. B) Schematic diagram of experimental protocol used for silencing experiments. C) Representative flow cytometric plots showing frequency of infected (Gag<sup>+</sup>) primary T cells following two days of co-culture with autologous, HIV 89.6 infected primary MDM. T cells were identified in co-culture by gating on CD3<sup>+</sup> CD14<sup>-</sup> cells as shown in Fig S2. D) Summary graph displaying relative infection of T cells as measured in C and normalized to wild type. (*n*=2 independent donors) E) Virus release by co-cultured MDM and T cells as measured by p24 ELISA and normalized to wild type. (*n*= 2 independent donors).

010  
011  
012  
013  
014  
015  
016  
017  
018  
019  
020  
021

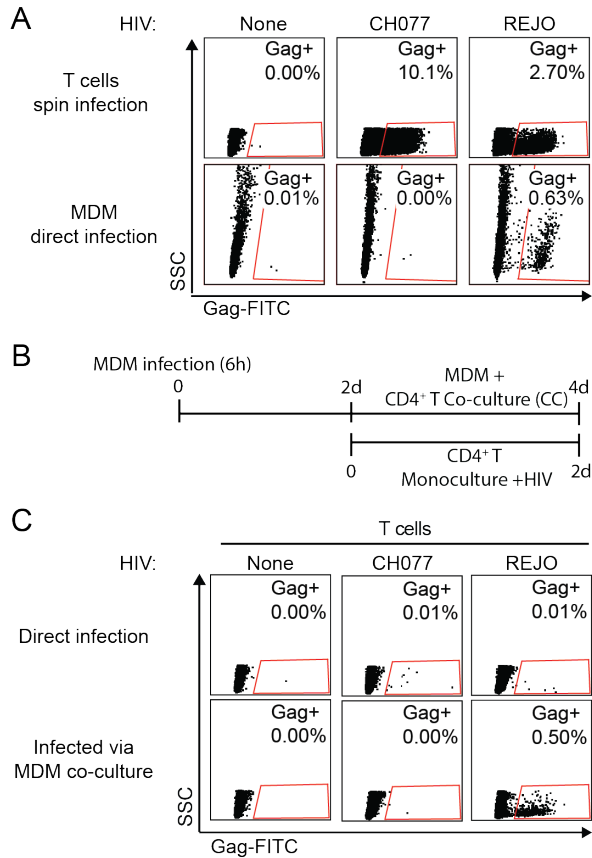

022  
023  
024  
025  
026  
027  
028  
029  
030

**Figure 7: MDM enhance infection of T cells by transmitted/founder (T/F) viruses.** A) Flow cytometry plots of primary human T cells 2 days after 2 hour spinnoculation or MDM 4 days after six hour incubation with 50 $\mu$ g of the T/F virus indicated. B) Schematic diagram of protocol for experiments shown in part C. C) Flow cytometry plots to measure the percentage of Gag<sup>+</sup> T cells 2 days after infection by the method indicated. For direct infection, T cells were continuously cultured with with 50 $\mu$ g of virus over the two day incubation period. For infection via MDM co-culture, T cells were co-cultured with MDM transiently exposed to 50 $\mu$ g of virus as in part A. For the co-culture assays, T cells were identified in co-culture by gating on CD3<sup>+</sup> CD14<sup>-</sup> cells. *n*=1 donor.

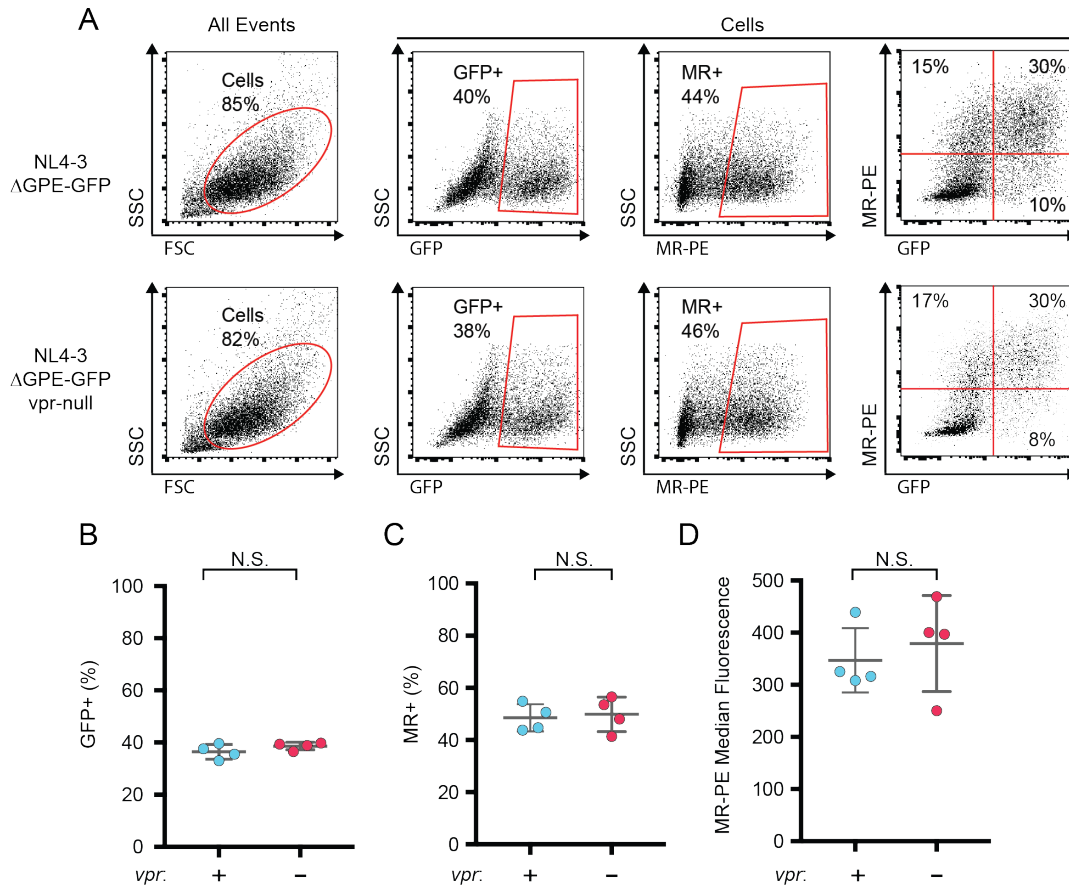

031  
032

033 **Supplement Figure 1: Vpr does not affect MR expression in co-transfected HEK293T cells.** A) Representative  
034 flow cytometric analysis of HEK293T cells co-transfected with the indicated GFP-expressing HIV genome (NL4-3  
035  $\Delta$ GPE-GFP plus or minus an intact *vpr* open reading frame) and an expression vector containing MR  
036 (pcDNA3.hMR). The transfections were performed four times and a representative pair of *vpr*-competent and *vpr*-  
037 null transfections was chosen. B) Summary graph showing the percentage of cells that are transfected (GFP+)  
038 following co-transfection as in A. C) Summary graph showing the percentage of cells that remain MR+ following co-  
039 transfected as in B. D) Summary graph showing the the median MR-PE fluorescence of all cells following co-  
040 transfected as in A. For all graphs, the mean plus or minus standard deviation is shown. ( $n=4$  experimental  
041 replicates). Statistical significance was determined by a two-tailed, paired *t*-test. N.S. – not significant:  $p=0.30$ ,  
042  $p=0.66$ , and  $p=0.57$  respectively.

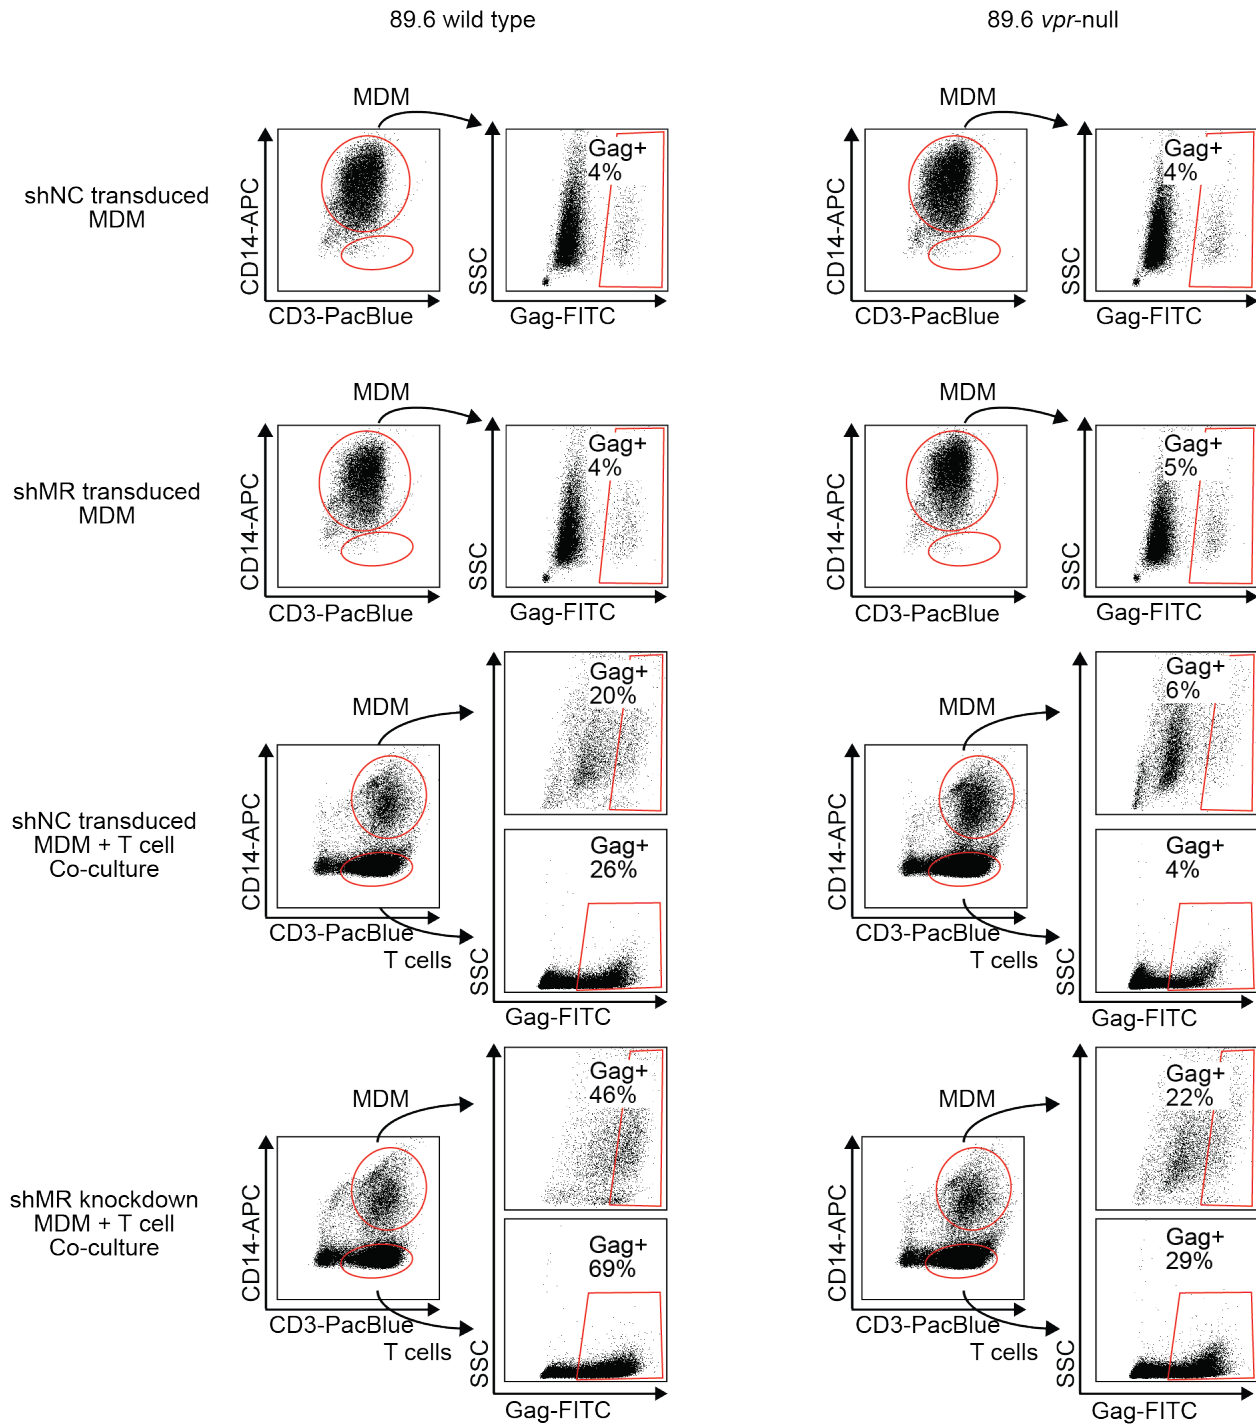

043  
044  
045  
046  
047  
048  
049

**Supplemental Figure 2: T cells and MDM can be identified by flow cytometry and the percentage of each that are Gag+ can be measured separately.** Flow cytometric dot plots illustrating segregation of CD14+ MDM from CD3+ T cells in co-cultures and subsequent assessment of HIV-1 infection by intracellular Gag p24 stain after treatment of the indicated cultures treated as shown in Fig 6B.  $n=2$  independent donors. Plots from one donor are shown here and Gag+ percentages from both are shown in Figure 6.
